1 **TITLE PAGE**

2 **Running head: Germination transcriptome in aging seeds**

3

4 **Too little, too late: transcription during imbibition of lethally aged soybean**  
5 **seeds is weak and delayed, but not aberrant**

6

7 Margaret B. Fleming<sup>1\*,2</sup>, Eric L. Patterson<sup>3</sup>, and Christina Walters<sup>1\*</sup>

8

9 <sup>1</sup>USDA-ARS, National Laboratory for Genetic Resource Preservation, 1111 S. Mason Street,  
10 Fort Collins, CO, 80521, USA; <sup>2</sup> Department of Plant Biology, 612 Wilson Road, Room 262,  
11 Michigan State University, East Lansing, MI 48824; <sup>3</sup>Department of Plant, Soil and Microbial  
12 Sciences, Giltner Hall, 293 Farm Lane, Room 103, East Lansing, MI 48824

13

14

15

16 **Author of correspondence:** Christina Walters

17 970-492-7601 [Christina.Walters@ars.usda.gov](mailto:Christina.Walters@ars.usda.gov)

18

19 Email: MBF, [flemi221@msu.edu](mailto:flemi221@msu.edu) ELP, [patte543@msu.edu](mailto:patte543@msu.edu)

20

21

22 **Subject areas:** seed physiology; plant growth and development

23

24

25 **Date of submission: 25 March 2021**

26

| <b>Word Count</b>                        |      | <b>Figure &amp; Table count</b> |    |
|------------------------------------------|------|---------------------------------|----|
| Total word (excl. summary, ref, legends) | 6038 | Total # figures (not suppl)     | 9  |
| Summary                                  | 193  | # color figures                 | 6  |
| Introduction                             | 991  | # tables                        | 0  |
| Materials and Methods                    | 1643 | # supporting infom-graphs       | 4  |
| Results                                  | 1769 | # supporting infom-tables       | 10 |
| Discussion                               | 1514 |                                 |    |
| Acknowledgements                         | 44   |                                 |    |

27

28 Summary (193 words)

- 29 • This study investigates alive to dead signals in seeds that aged during cool, dry storage.  
30 Signals may invoke abrupt, lethal metabolic pathways or reflect effects of accumulated small  
31 injuries which impair recovery from life in the dry state.
- 32 • Cohorts of soybean (*Glycine max* cv. ‘Williams ’82) seeds were stored for 3, 19 and 22  
33 years. Transcriptomes of dry embryonic axes and axes 24 hours after imbibition (HAI) were  
34 sequenced to determine gene expression patterns. These cohorts showed about <2, 40, and  
35 ~99% mortality, respectively, in response to storage and aging.
- 36 • A total of 19,340 genes were significantly differentially expressed (SDE) in imbibed axes  
37 compared to dry axes. Gene expression patterns of imbibed axes clustered into three groups  
38 that represented high, low, and no germination potential (GP). There were 17,360 SDE genes  
39 in high-GP axes and 4,892 SDE genes, mostly upregulated, in no-GP axes. Transcriptomes of  
40 no-GP axes were similar to healthy axes at 3 HAI.
- 41 • Slow transcription, not transcription errors or novel expression pathways, portends failure to  
42 transition from seed to seedling. We conclude that the signature of death in dry aged seeds  
43 arises from metabolism that is “too little and too late.”

44

45 Key words: aging, gene expression, germination, imbibition, metabolism, mortality, seed  
46 storage, viability

47

## 48 Introduction

49 Injuries accumulate in organisms dying of “old age.” Oxidative reactions, often involving  
50 reactive oxygen species (ROS), are implicated in aging (recently reviewed for plant germplasm  
51 by Leprince *et al.*, 2017; Waterworth *et al.*, 2019; Nagel *et al.*, 2019; Zinsmeister *et al.*, 2020;  
52 Ballesteros *et al.*, 2020; Zhou *et al.*, 2020). In dry seeds, aging reactions affect multiple cellular  
53 components (Smith & Berjak, 1995; Walters, 1998; Rajjou *et al.*, 2008; Terskikh *et al.*, 2008;  
54 Kranner *et al.*, 2011; Colville *et al.*, 2012; El-Maarouf-Bouteau *et al.*, 2013; Michalak *et al.*,  
55 2013; Kalemba & Pukacka, 2014; Xin *et al.*, 2014; Morscher *et al.*, 2015; Nguyen *et al.*, 2015;  
56 Veselova *et al.*, 2015; de Souza-Vidigal *et al.*, 2016; Mira *et al.*, 2016, 2019, 2020; Nagel *et al.*,  
57 2019; Fleming *et al.*, 2017, 2018, 2019; Yin *et al.*, 2017; Kurek *et al.*, 2019; Wiebach *et al.*,  
58 2019; Zhao *et al.*, 2020). Sometimes aging to death is attributed to a specific chemical change,  
59 such as oxidation of acyl double bonds in membrane lipids (Wiebach *et al.*, 2019; Sattler *et al.*,  
60 2004) or accumulation of abnormal L-isoaspartyl residues in the proteome of dry seeds (Ogé *et*  
61 *al.*, 2008). However, cause-effect relationships between change of *specific* cellular constituents  
62 and death have always been elusive, especially as we continue to discover more cellular  
63 components damaged by time. Accordingly, we have suggested that aging results from an  
64 accumulation of small changes, and at some point, a minor change has a major lethal effect,  
65 analogous to a ‘straw that breaks the camel’s back’. The distinction between mechanisms –  
66 mortality caused either by a specific major event or by many non-specific minor events – affects  
67 how we might detect aging, predict longevity and reinvigorate (if possible) damaged germplasm.

68 Deciphering the aging mechanism(s) of dry seeds is further complicated by our inability  
69 to pinpoint the time of death. There is a discrete time-frame during storage when dry germplasm  
70 has and then loses the potential to complete germination (Walters, 1998). The timing of this  
71 transition between alive and dead (i.e., longevity) varies considerably within and among species  
72 and cell types for reasons yet unknown (recently reviewed by Colville & Pritchard, 2019;  
73 Ballesteros *et al.*, 2020; Solberg *et al.*, 2020). Moreover, this transition occurs discreetly in dry  
74 seeds because we have limited tools to measure aliveness in “cryptobiotic” organisms. Therefore,  
75 we learn that a dry organism perished when it does not revive upon hydration. Did hydration  
76 deliver the lethal blow? Early research suggesting that hydration induces aging reaction cascades  
77 (Smith & Berjak, 1995) is supported by evidence of programmed cell death metabolism in aged,  
78 imbibing seeds (Kranner *et al.*, 2006; El-Maarouf-Bouteau *et al.*, 2011; Chen *et al.*, 2013; Wang  
79 *et al.*, 2015). Alternatively, early imbibition is a time for repairing damaged cellular components  
80 (Ogé *et al.*, 2008; Waterworth *et al.*, 2010, 2016, 2019; Rajjou *et al.*, 2012; Sano *et al.*, 2016) or

81 activating transcription, translation and post-translational modifications essential for germination  
82 (Rajjou *et al.*, 2012; Galland *et al.*, 2014; Bai *et al.*, 2017; Yin *et al.*, 2018; Sano *et al.*, 2020;  
83 Zhou *et al.*, 2020). Conceivably, death may occur when repair pathways take precedence over  
84 seedling development pathways (Masubelele *et al.*, 2005; Rosental *et al.*, 2014; Dirk & Downie,  
85 2018; Cai, *et al.*, 2020; Sano *et al.*, 2020).

86 This paper focuses on the transcriptional machinery in dry-stored seeds as an essential  
87 component of germination potential (Rajjou *et al.*, 2012; Bai *et al.*, 2017; Dirk & Downie, 2018).  
88 Our study assesses the transcriptome of aged, *imbibed* seeds, compared to our earlier studies  
89 where we examined the transcriptome of aged, *dry* seeds. Numerous studies show continuous,  
90 possibly linear, degradation of RNA with time in dry storage (El-Maarouf-Bouteau *et al.*, 2013;  
91 Fleming *et al.*, 2017, 2018, 2019; Walters *et al.*, 2020; Sano *et al.*, 2020; Zhao *et al.*, 2020),  
92 which links rates of RNA degradation and longevity. However, correlation of mortality with  
93 degradation of a specific amount of total RNA or mRNA, or a specific transcript, was not  
94 demonstrated for dry seeds. We, therefore, explore a possible “death signature” for aged seeds  
95 during hydration. In particular, we looked for up- or down- regulation of a total of 3,492  
96 ‘germination genes’. The subset of genes with changed regulation included transcription factors  
97 implicated in soybean seed longevity, enzymes critical for DNA repair (including PIMT, PARP,  
98 DNA ligases, and cyclins), homologs of genes required for germination in *Arabidopsis* (ABI3,  
99 HSFA9, PEPCK, and TIM), endo-beta-mannanases, LEAs, and enzymes involved in  
100 fermentation, lipid degradation, sugar metabolism, protein biosynthesis, and protein homeostasis  
101 (reviewed by Beilkeny-Rabelo *et al.*, 2016; Pereira Lima *et al.*, 2017; Cai, *et al.*, 2020; Sano *et*  
102 *al.*, 2020; Zinsmeister *et al.*, 2020; Zhou *et al.*, 2020; also references in this paper).

103 We hypothesized that imminent death would be reflected by differences in expression  
104 patterns for key genes among healthy and dying seeds. We predicted down-regulation of key  
105 transcripts in dying seeds because the transcripts might be preferentially fragmented during dry  
106 storage (Fleming *et al.*, 2017, 2018, 2019) and further degraded during imbibition. We also  
107 postulated that *de novo* transcription, that might serve to replace damaged transcripts, would  
108 likely be impaired by damaged transcriptional machinery.

109 Radicle emergence occurs in healthy soybean seeds at about 24 hours after imbibition  
110 (HAI) and transcription patterns during early stages of normal germination are established  
111 (Beilkeny-Rabelo *et al.*, 2016). We contrasted these established patterns with those of dying and  
112 recently dead soybean seeds from a unique collection of Williams ’82 cohorts harvested and  
113 stored since 1988 (Fleming *et al.*, 2017; Walters *et al.*, 2020). We compared transcriptomes

114 among cohorts that were mostly vigorous or mostly dead, as well as a cohort exhibiting signs of  
115 rapid viability loss. A cotyledon greening assay was used to distinguish germination capacity in  
116 the dying cohort, which had nearly equal proportions of viable and inviable seeds. Instead of the  
117 predicted down-regulation of key transcripts, we found strong evidence that axes which could  
118 not complete germination still actively transcribed ‘germination genes’ but at a much slower  
119 pace.

120

## 121 Materials and Methods

### 122 *Plant material*

123 Soybean (*Glycine max* (L.) Merr, cv. ‘Williams 82’) seeds are part of a legacy collection  
124 of cohorts harvested between 1988 and 2019 (Fleming *et al.*, 2017). Seeds were received 3-6  
125 months after harvest and germination percentages were high (between 98-100%) for all cohorts.  
126 Seeds were stored at 5 °C and approximately 30-50% relative humidity (RH). Under these  
127 conditions, germination percentages tend to decline after about 10 to 15 years (Walters *et al.*,  
128 2020). For this study, we selected cohorts that either showed no evidence of aging (harvested in  
129 2015, 2015H), severe aging (harvested in 1996, 1996H) and rapid viability loss (harvested in  
130 1999, 199H). About half of the 1996H cohort was dead by 2008 (P50 = 12 years) and nearly all  
131 were dead by 2013 (data not presented). The 1999H cohort began exhibiting symptoms of aging  
132 in 2014 and 2015 assays (data not presented).

133

### 134 *Viability assessments*

135 Seed cohorts were monitored for viability annually or biennially using germination  
136 assays. Germination assays occurred in 2017, 2018 and 2019, and flanked the time that RNA was  
137 extracted in 2018. Monitor tests consisted of about 50 to 200 seeds that were prehydrated  
138 overnight at near 100% RH, then rolled in wet paper towels (Anchor Paper Co., St Paul, MN,  
139 USA) and incubated in the dark at 25 °C for seven days. Seedlings were scored for normal  
140 germination following AOSA criteria (AOSA, 2012); radicle length was also measured to assess  
141 vigor.

142 We associated cotyledon greening with embryonic axis growth in all cohorts, especially  
143 in 1999H seeds. The reliability of this method was tested in a number of cohorts. Embryonic  
144 axes were separated from cotyledons of both dry seeds and seeds imbibed in the dark for 24  
145 hours. Excised axes were placed on Murishage and Skoog basal medium (to visualize effects of  
146 surface sterilization and nutrients) or on dampened paper. Viable axes germinated in culture or

147 expanded at least 2 cm on paper within 2-3 days after imbibition. Cotyledons were imbibed on  
148 paper for 24 hours in darkness, then placed in transparent plastic boxes in room light for 3-4 days  
149 and scored for whether they remained yellowish white, greened on the flat cotyledon surface or  
150 greened throughout. Thorough cotyledon greening invariably occurred in recently-harvested  
151 cohorts in which axes readily germinated (on nutrient medium) or expanded (on paper).  
152 Cotyledon greening rarely occurred in low-germinating cohorts stored for at least 22 years. In  
153 cohorts that had a mixed population of germinable and not-germinable seeds (such as 1999H),  
154 cotyledon greening provided a reliable marker of which axes were able to expand.

155 To compare germination speed among cohorts, time courses for water uptake, axis  
156 growth, and cotyledon greening were developed. Seeds rolled in wet paper towels (20-25 rolls  
157 containing 25-30 seeds each) were sampled every 2-8 hours for radicle emergence, cotyledon  
158 and axis fresh mass, and axis dry mass; dry mass was measured after heating axes at 95 °C for 2  
159 days. Seeds were considered germinated when radicles elongated > 2 mm from the testa.  
160 Cotyledons that were severed from axes at each time point were placed in light and observed  
161 periodically for color changes. For each roll, germination proportions were calculated as the  
162 number of germinated seeds divided by the number of seeds in the roll.

163

#### 164 *RNA extraction, characterization, and sequencing*

165 In 2018, we extracted RNA from embryonic axes for transcriptome sequencing. Seeds  
166 were imbibed at 25 °C in the dark and embryonic axes were excised at the cotyledonary node 24  
167 hours after imbibition (HAI), leaving the plumule attached to the cotyledon. A total of 20 axes  
168 were excised from 1996H and 2015H seeds, and 60 axes were excised from 1999H seeds. Each  
169 axis was flash-frozen in liquid nitrogen and stored at -80C. To estimate germination potential,  
170 cotyledons were kept moist in constant room-lit conditions (cool white fluorescent lights). At 72  
171 HAI (48 hours of cotyledon light exposure), each cotyledon was examined for greening,  
172 presence of microbial contamination, and plumule elongation. Based on this response, each  
173 excised axis was categorized as viable (1999H and all 2015H) or inviable (1999H and all  
174 1996H).

175 Individual embryonic axes, excised from dry (0 HAI) and hydrated (24 HAI) seeds, were  
176 ground to a fine powder in a Retsch (Haan, Germany) Bead Mill under liquid nitrogen in  
177 microcentrifuge tubes containing 1 mg of polyvinylpyrrolidone-40 (Fisher Scientific, Fair Lawn,  
178 NJ, USA). RNA was extracted from each ground axis using the Qiagen (Hilden, Germany) Plant

179 RNeasy kit following the recommended protocol, with the additional step of repeating the final  
180 wash with 500  $\mu$ L of buffer RPE to reduce guanidine hydrochloride contamination.

181 RNA yield was quantified using a Nanodrop 1000 spectrophotometer (Thermo Fisher  
182 Scientific, Wilmington, DE, USA). Samples were diluted to 1 ng  $\mu$ L<sup>-1</sup> of nucleic acids in  
183 nuclease-free water. Integrity of diluted RNA was quantified on an Agilent (Waldbronn,  
184 Germany) Bioanalyzer, using Agilent RNA 6000 Pico chips and the Plant RNA Pico assay  
185 (Agilent 2100 Expert software version B.02.08.SI648 R3), following the manufacturer's  
186 protocols. Five axes producing the highest RNA Integrity Numbers (RINs) for each combination  
187 of cohort (1996H, 1999H, 2015H), imbibition time (0 or 24 HAI), and viability category (for  
188 1999H imbibed axes), were selected for sequencing.

189 Total RNA was submitted to the University of Delaware Sequencing and Genotyping  
190 Center. After poly-A selection, 1  $\mu$ L of a 1:50 dilution of ERCC Spike-In mix (Ambion, Thermo  
191 Fisher Scientific, Wilmington, DE, USA) was added to each sample. All libraries were pooled  
192 and sequenced on two lanes of an Illumina (San Diego, CA, USA) HiSeq with 250 bp paired-end  
193 reads. The sequencing dataset for Williams '82 axes from 1996H, 1999H, and 2015H cohorts is  
194 subsequently referred to as the "storage time experiment".

195 Transcriptome data from the storage time experiment were compared with RNA-seq data  
196 collected for healthy soybean axes of cv. 'BRS 284' at 0, 3, 6, 12, and 24 HAI (Bellieny-Rabelo  
197 *et al.*, 2016). All 50 datasets from this experiment were downloaded from the Sequence Read  
198 Archive using SRA Explorer ([sra-explorer.info](http://sra-explorer.info)) and project accession number PRJNA326110.  
199 This sequencing dataset is subsequently referred to as the "imbibition time experiment". All  
200 analyses were conducted on both the storage time and imbibition time experiments  
201 simultaneously.

202

### 203 *Identifying significantly differentially expressed transcripts*

204 Adapters were trimmed from all reads with CutAdapt v. 2.5 (Martin, 2011), and any  
205 reads < 15 bp were excluded. Reads were aligned to the most recent soybean reference  
206 transcriptome (Gmax\_508\_Wm82.a4.v1.transcript.fa; Joint Genome Institute, Phytozome) using  
207 hisat2 v. 2.1.0 (Kim *et al.*, 2019) with standard parameters, and converted to indexed bam files  
208 using SAMtools v. 1.9 (Li *et al.*, 2009). The number of reads associated with each transcript  
209 (counts) was extracted from indexed bam files using the SAMtools function 'idxstats' (Table  
210 **S1,S2**). Differential expression of transcripts in imbibed versus dry samples was identified in R  
211 (R Core Team, 2018) using edgeR v. 3.26.8 (Robinson *et al.*, 2010; McCarthy *et al.*, 2012).

212 Imbided samples were compared to the dry controls from their respective experiment (storage  
213 time or imbibition time). Before calculating differential expression, lowly-expressed transcripts  
214 were automatically identified and removed from further consideration using the `filterByExpr`  
215 function, and libraries were normalized based on library size using the `calcNormFactors`  
216 function. Transcripts were considered significantly differentially expressed (SDE) when  $|\log_2$   
217 fold-change (FC) in expression|  $\geq 2$  and adjusted p-value  $< 0.001$  (Table S3,S4).

218

### 219 *Functional characterization and transcriptome clustering*

220 An X4 MapMan v. 3.6.0RC1 (Thimm *et al.*, 2004) mapping for soybean was generated  
221 with Mercator4 v.2 (Schwacke *et al.*, 2019). Transcripts were automatically assigned to  
222 annotation bins (Table S5), which were then used to assess over-representation of annotations  
223 within similarly-expressed clusters of transcripts (see below).  $\log_2$ FC for transcripts SDE in a  
224 given treatment were visualized using the ‘X4.1 Metabolism overview R1.0.xml’ map.

225 Heatmaps were generated in R using `pheatmap` v. 1.0.12 (Kolde, 2019) to cluster  
226 experimental treatments and transcripts by expression values.  $\log_2$ FC values were converted to  
227 z-scores [ $z = (x - \mu)/\sigma$ , where  $x$  is the observed value,  $\mu$  is the sample mean and  $\sigma$  is the sample  
228 standard deviation] before plotting, confining values to the same scale for each transcript. A  
229 negative z-score indicates that  $\log_2$ FC for that transcript in that sample was lower than the mean  
230 across all samples. As the imbibition time experiment used much deeper coverage than the  
231 storage time experiment, z-score transformation was done independently for each experiment.

232 Any transcript identified as SDE in the storage time experiment was included in the  
233 heatmap (19,340 transcripts). Transcripts were clustered using z-score transformed  $\log_2$ FC  
234 values from the storage time experiment, calculating the distance matrix with Euclidean distance  
235 and using the complete linkage method for hierarchical clustering (Table S6). Experimental  
236 groups (no-, low-, and high-germination potential 24 HAI [storage time experiment] as well as 3,  
237 6, 12, and 24 HAI [imbibition time experiment]) were clustered with the same clustering  
238 parameters, using z-score transformed values from all experiments.

239 After clustering, a two-proportion z-test was performed to identify which MapMan  
240 annotation categories were over- or under-represented in each cluster of transcripts. This test  
241 compares the abundance of a category within a cluster to the abundance of that category in the  
242 entire population of SDE transcripts. A Bonferroni-corrected alpha level of 0.0003 (0.05/174)  
243 was used to determine categories with significant over- or under-representation within a cluster  
244 (Table S7).



245

246 ‘Germination genes’

247 A literature survey was performed to identify genes important for germination. Most  
248 genes were characterized in *Arabidopsis*; *Glycine max* homologs to *Arabidopsis* genes were  
249 identified using TAIR ([arabidopsis.org](http://arabidopsis.org)). In Soybase ([soybase.org/correspondence](http://soybase.org/correspondence)), gene IDs  
250 were converted from genome version a2 to a4 and paralogous genes within the *Glycine max*  
251 genome were identified. In some cases, only a general class was identified (*e.g.*, “fermentation”),  
252 which could always be matched to a MapMan annotation bin. Expression of all genes within the  
253 bin was examined (**Table S8**). The expression of 5,712 transcripts (corresponding to 3,492  
254 ‘germination genes’) that were SDE in any GP category was visualized with heatmap using the  
255 same z-score adjustment and clustering parameters described above (**Table S9**).

256

257 Results

258 ***Seed health***

259 *Germination time course and cotyledon greening assays*

260 Germination percentages, measured four times between 2017 and 2019, were 98-99%  
261 (2015H), 60-90% (1999H) and 0-3% (1996H). A germination time course, conducted in 2019,  
262 depicts germination events which indicate health of the cohort as well as individual seeds.  
263 Radicle emergence was first observed 22 HAI in the 2015H and 1999H cohorts, though at  
264 different proportions (9 and 1%, respectively) (**Fig. 1a**). Within 36 HAI, radicles emerged from  
265 95% and 42% of seeds from the 2015H and 1999H cohorts, respectively, compared to 0% in the  
266 1996H cohort. By 72 HAI, total germination of 95, 64 and 1% was observed for 2015H, 1999H  
267 and 1996H cohorts, respectively. Water content increased from 0.076 - 0.096 g H<sub>2</sub>O g<sup>-1</sup> dry  
268 weight (dw) for dry embryonic axes to 1.2 - 1.4 g H<sub>2</sub>O g<sup>-1</sup> dw 12 HAI for all cohorts (**Fig. 1b**).  
269 Rapid increases in water uptake and fresh mass occurred at 32 and 42 HAI for 2015H and 1999H  
270 axes, respectively, and was not observed for 1996H axes (**Fig. 1b,c**). Axes from the 2015H  
271 cohort began to accumulate dry matter 32 HAI, but this capacity was weakly or not observed in  
272 1999H or 1996H axes even 66 HAI (**Fig. 1d**).

273 The cotyledon greening assay reliably indicated axes that would and would not elongate  
274 and cotyledon attachment was not required for axis expansion or cotyledon greening (**Fig. S1**).  
275 Greening was rapid in 2015H seeds, usually occurring after 3 hours exposure to light (data not  
276 shown). Greening took longer in 1999H seeds (data not shown) and rarely occurred in 1996H  
277 seeds.

278

### 279 *RNA integrity among seed cohorts*

280 RNA was extracted in 2018 from dry and imbibed embryonic axes, providing data for  
281 seeds stored for 3, 19 and 22 years. Notably, RNA Integrity Numbers (RINs) neither increased  
282 nor decreased in imbibed samples compared to dry samples of the same cohort ( $p > 0.05$ ,  
283 Tukey's HSD, **Fig. 2, Table S10**). RINs were similar for 2015H and 1999H axes, regardless of  
284 whether their corresponding cotyledons turned green ( $p > 0.05$ , Tukey's HSD). RINs were  
285 significantly lower for 1996H axes compared to the 1999H and 2015H cohorts ( $p < 0.05$ ,  
286 Tukey's HSD) (**Fig. 2**).

287 Consistent with the RINs, electropherograms from 2015H and 1999H axes 24 HAI were  
288 mostly indistinguishable, showing typical patterns of high-integrity plant RNA, with two  
289 prominent peaks for the 18S and 25S rRNA subunits, minor peaks for the 5S rRNA subunit and  
290 plastid rRNAs, and an absence of prominent peaks in the "fast" region (27.25-41 s) (**Fig. S2**).  
291 Electropherograms from 1996H dry and imbibed axes had reduced 25S peaks relative to 18S  
292 peaks, as well as more prominent peaks in the "fast" region, indicating RNA fragmentation as  
293 reported previously (**Fig. S3**) (Fleming *et al.*, 2017, 2018, 2019).

294

### 295 *Transcriptome overview*

296 Global differences in  $\log_2FC$  expression among transcriptome libraries from individual  
297 embryonic axes were compared in a multidimensional scaling plot (**Fig. 3**). Instead of clustering  
298 by harvest year or cotyledon status, axes separated into four clusters corresponding to dry axes  
299 (all cohorts), axes from seeds with green cotyledons ["high germination potential" (GP), 1999H  
300 and 2015H], axes from seeds with white cotyledons ("no-GP," 1996H and 1999H), and a fourth  
301 group including axes from both 2015H and 1999H seeds having white or green cotyledons. This  
302 intermediate cluster, named "low-GP", was spatially separated from the two other 24 HAI axis  
303 clusters and was treated separately in subsequent analyses.

304 Overall, in the storage time experiment, 19,340 genes were significantly differentially  
305 expressed (SDE) in imbibed compared to dry axes, according to stringent criteria of  $|\log_2FC| > 2$   
306 and  $p\text{-value} < 0.001$ . More than half (58%) of SDE genes were shared among GP categories (**Fig.**  
307 **4, Table S3**). High-GP axes differed most from dry axes (17,360 SDE genes) and no-GP axes  
308 differed least from dry axes (4,892 SDE genes). Most (94%) of the SDE genes in low-GP axes  
309 were also SDE in high-GP axes.

310 Of the genes SDE in each GP category, 67, 76 and 90% of transcripts were upregulated in  
311 high-, low- and no-GP axes, respectively (see upper quadrants in **Fig. 5a,b,c**). Gene expression in  
312 high- and low-GP axes was highly correlated ( $R^2 = 0.94$ ,  $P \ll 0.01$ ), and the slope of correlation,  
313  $1.27 \pm 0.01$  (uncertainty of slope at 95% confidence) indicated more intense DE in high-  
314 compared to low-GP axes (**Fig. 5a**). The correlation was weaker between high-GP and no-GP  
315 axes ( $R^2 = 0.57$ ,  $P \ll 0.01$ , slope =  $1.25 \pm 0.04$  at 95% confidence), but the slopes were not  
316 significantly different (t-test of slopes not significant at  $P > 0.15$ ) (**Fig. 5b**). Some transcripts  
317 were SDE in both high- and no-GP axes, but in opposite directions (lower right and upper left  
318 quadrants). Comparisons of the  $\log_2FC$  for low- and no-GP axes were also significantly  
319 correlated ( $R^2 = 0.69$ ,  $P \ll 0.001$ ), and the slope of  $1.06 \pm 0.03$  was significantly different than  
320 correlations involving the high-GP group (t-test of slopes significant at  $P \ll 0.01$ ) (**Fig. 5c**).  
321

321

### 322 *Functional differences in transcriptomes of aged versus healthy seeds*

323 Transcripts were assigned to MapMan annotation categories, and  $\log_2FC$  values for SDE  
324 genes in each GP category were mapped based on their annotation to understand how  
325 metabolism might differ between GP categories (**Fig. 6, Tables S3,S5**). High-GP axes had SDE  
326 genes distributed among all major metabolic pathways (**Fig. 6a**), including pathways essential for  
327 photosynthesis (light reactions, ROS, Calvin cycle). Other categories with many SDE genes in  
328 high-GP axes included catabolism of lipids and raffinose oligosaccharides, compounds which  
329 accumulate in the embryonic axis during soybean seed development. MapMan annotation  
330 categories were more sparsely populated in low- and no-GP axes because there were fewer SDE  
331 genes (**Fig. 6b,c**). For example, genes involved in lipid or carbohydrate mobilization or  
332 nucleotide metabolism are somewhat and barely represented in low- and no-GP axes,  
333 respectively. This overview of embryonic axis metabolism 24 HAI revealed no dominant  
334 metabolic category for any GP class. SDE genes in no-GP axes, which had 72% less differential  
335 expression than high-GP axes, were distributed among annotation categories in approximately  
336 the same ratio as in high-GP axes.  
337

337

### 338 *Gene expression during imbibition: from dry seed to completed germination or death*

339 Gene expression patterns of healthy soybean seeds during an imbibition time course  
340 provide a useful context for interpreting the effects of storage time. Transcriptomic data from an  
341 imbibition time course of healthy soybean (cv. 'BRS 284') axes ("imbibition time experiment",  
342 Bellieny-Rabelo *et al.*, 2016) were compared to transcriptomes of high-, low- and no-GP axes

343 (“storage time experiment”). In the imbibition time experiment, the number of SDE ( $|\log_2FC| >$   
344 2, p-value < 0.001) genes in imbibed compared to dry (0 HAI) axes increased at each time point,  
345 with 2,888, 7,267, 14,796, and 28,032 SDE genes observed at 3, 6, 12 and 24 HAI (Fig. S4,  
346 Table S4). A core set of 1917 genes was SDE at all time points, and 982 of these genes were also  
347 SDE in high-, low- and no-GP axes. More genes were up-regulated than down-regulated at all  
348 imbibition time points, but the number of down-regulated genes increased from 1% to 33% of  
349 SDE genes between 3 and 24 HAI.

350 Similarly to the storage-time experiment, SDE transcripts were found in all the major  
351 metabolic pathways at all time points in the imbibition-time experiment. The magnitude of  
352 differential expression increased with imbibition time (Fig. 7), and at 24 HAI, gene expression  
353 patterns for ‘BRS 284’ axes were similar to high-GP ‘Williams 82’ axes, with all metabolic  
354 pathways represented (compare Fig. 7d with Fig. 6a). In healthy ‘BRS 284’ axes 3 HAI, fewer  
355 genes were SDE, and these genes had smaller changes in differential expression (Fig. 7a),  
356 compared to no-GP ‘Williams 82’ axes 24 HAI (Fig. 6c).

357 To further compare expression patterns between storage time (high-, low-, and no-GP in  
358 cv. ‘Williams ‘82’ axes 24 HAI) and imbibition time (3, 6, 12, and 24 HAI in healthy cv. ‘BRS  
359 284’ axes), we used a heatmap of the 19,340 genes identified as SDE in any GP category in the  
360 storage-time experiment (Fig. 4,8). Hierarchical clustering by treatment (GP category or  
361 imbibition time) showed that high-GP axes (Fig. 6a) clustered with ‘BRS 284’ axes 24 HAI;  
362 low-GP axes (Fig. 6b) clustered with ‘BRS 284’ axes 6-12 HAI; and no-GP axes (Fig. 6c)  
363 clustered with ‘BRS 284’ axes 3 HAI. Axes of different GP categories did not cluster together,  
364 and only 6- and 12-HAI axes, among all imbibition time-points, clustered together.

365 Six general gene expression clusters were identified based on expression in high-, low-,  
366 and no-GP axes. The largest (Cluster 5: 10,325 genes) included genes with highest expression in  
367 high-GP and healthy axes 24 HAI and lowest expression in no-GP axes and healthy axes 3 HAI.  
368 A smaller cluster (Cluster 1: 6,073 genes) showed the opposite pattern, with highest expression  
369 in no-GP and healthy axes 3 HAI and lowest expression in high-GP and healthy axes 24 HAI. In  
370 most clusters, approximately average expression was found in low-GP axes as well as healthy  
371 axes 6 or 12 HAI (Table S6).

372 Genes belonging to a cluster may share functions as well as expression patterns. To  
373 identify functions associated with the different clusters, we tested whether any of the 28  
374 MapMan annotation categories were significantly over- or under-represented in any cluster using  
375 a two-proportion z-test (Table S6,S7). Significantly over-represented categories in Cluster 5

376 (highest expression in high-GP/24 HAI axes) included cell cycle organization, cell wall  
377 organization, photosynthesis, and cytoskeleton organization; cytoskeleton organization was also  
378 over-represented in Cluster 2. Categories significantly under-represented in Cluster 5 included  
379 RNA biosynthesis and RNA processing. RNA processing, along with protein biosynthesis and  
380 homeostasis, were over-represented in Cluster 1 (highest expression in no-GP/3 HAI axes).

381

### 382 *A closer look at genes important for seed germination in healthy and aged seeds*

383 A total of 5,712 transcripts, representing 3,492 genes of known importance for seed  
384 germination, were identified from the literature. Only 27% of these “germination genes” were  
385 SDE in high-, low-, or no-GP axes from the storage time experiment (Table S8). Hierarchical  
386 clustering by treatment (GP category and imbibition time), using only the SDE germination  
387 genes (Fig. 9, Table S9), produced identical clustering as in Figure 8, in which all SDE genes  
388 were considered. Most functional categories had a mixture of expression patterns, with some  
389 genes showing highest expression in no-GP/3HAI axes and lowest expression in high-GP/24  
390 HAI axes, and the remaining genes showing the opposite expression pattern. However, all SDE  
391 ABI3 homologs (Category F, Fig. 9), longevity-associated transcription factors (Category J) and  
392 mRNA quality control genes (Category Q) showed highest expression in no-GP/3 HAI axes,  
393 while all SDE PARPs (Category D) and fermentation genes (Category H) showed highest  
394 expression in high-GP/24 HAI axes.

395

### 396 Discussion

397 In this paper, we sought a transcriptional signal corresponding to lost viability in hydrated  
398 soybean seeds that had been stored dry for decades. We hypothesized that seeds become inviable  
399 during imbibition (Smith and Berjak, 1995), because transcriptomes of dry seeds did not reveal a  
400 “death” signal (Fleming *et al.*, 2017, 2018, 2019). We sequenced transcriptomes of dry and  
401 imbibed axes from three seed cohorts at different stages of degradation (Walters *et al.*, 2020): no  
402 loss in viability (98-99% germination, 2015H), almost complete loss (0-3% germination, 1996H),  
403 and rapid loss in viability (60-90% germination depending on assay conditions, 1999H) (Walters  
404 *et al.*, 2020). Transcriptomes of healthy, dying, and dead dry axes were similar. Imbibition for 24  
405 hours resulted in three distinct patterns of gene expression, which we named high-, low- and no-  
406 germination potential (GP) (Fig. 3). Healthy axes (2015H) were found in both high- and low-GP  
407 categories; dying axes (1999H) were found in all three GP categories. Transcript expression was  
408 less intense overall, and few genes were down-regulated, in the no-GP cluster compared to the

409 high-GP cluster (Fig. 5b). However, comparing no-GP axes (imbibed for 24 hours) to healthy  
410 axes imbibed for less time showed that the expression profile of no-GP axes was highly similar  
411 to healthy axes imbibed for just 3 hours (Fig. 6c,7a,8). These data contribute to the growing  
412 understanding of a metabolic burst that transitions dry seeds into seedlings (Rajjou et al., 2012;  
413 Galland et al., 2014; Bellieny-Rabelo et al., 2016; Bai et al., 2017). Our work further suggests  
414 that damage to seeds during dry storage decreases metabolic competence, reducing the metabolic  
415 burst to a fizzle.

416

417 *Imbibition allows significant up- and down-regulation of genes in vigorous axes*

418 Earlier studies suggested that RNA fragments during dry storage, and we detected this  
419 tendency in mRNA using whole-molecule MinION sequencing techniques (Fleming *et al.*,  
420 2018). The current study is based on Illumina sequencing datasets, which showed similar  
421 transcriptomes among dry ‘Williams 82’ axes stored for 3 to 22 years (Fig. 3) even though they  
422 differed in viability (Fig. 1) and RNA integrity (Fig. 2). The Illumina platform provides  
423 sufficient coverage depth to compare differential expression across 35 samples, but this comes at  
424 the expense of observing RNA fragmentation.

425 Differential expression in high-GP ‘Williams 82’ axes and ‘BRS 284’ axes 24 HAI was  
426 similar (Fig. 8). For example, genes involved in photosynthesis were found to be upregulated,  
427 indicating preparation for transitioning to autotrophic growth (Fig. 6,7, Table S6). The similarity  
428 of transcriptomes of healthy axes from different cultivars allowed us to compare expression  
429 patterns between ‘Williams 82’ axes of different GPs and ‘BRS 284’ axes imbibed for different  
430 times.

431 Bellieny-Rabelo *et al.* (2016) identified many genes that were previously implicated in  
432 germination by comparing changes in adjacent time points during imbibition. Our goal, rather,  
433 was to uncover differences between alive and dead seeds that were fully imbibed and ready (or  
434 not) to complete germination. Many of the genes implicated in germination were not flagged in  
435 our study, perhaps because transient up- and down- regulation is completed by our sampling time  
436 at 24 HAI. Alternatively, identification of ‘germination genes’ during imbibition may be masked  
437 because their transcripts or proteins were already produced during seed maturation (Pereira Lima  
438 *et al.*, 2017), except for a few genes within broad metabolic categories; our analyses do not  
439 reveal candidates. Overall, our findings suggest that germination potential hinges on swiftly  
440 reaching a baseline level of metabolic competence, rather than effective transcription or  
441 translation of specific ‘germination genes.’

442

443 *Axes with no germination potential have functional transcriptional machinery*

444 Transcriptomes of no-GP axes 24 HAI were distinct from dry axes and from healthy  
445 imbibed axes (Fig. 3). That said, many SDE genes in no-GP axes that were shared by low- and  
446 high-GP axes were upregulated (Fig. 4,5), even though the same genes were strongly down-  
447 regulated in high-GP axes (note low  $R^2$  for  $\log_2FC$  in high-GP versus no-GP axes in Fig. 5b). In  
448 fact, no-GP axes produced new transcripts, although their weaker expression and misregulation  
449 in comparison to high-GP transcriptomes suggests that no-GP transcriptomes may be too small  
450 or uncoordinated to complete germination. We saw no evidence of divergent metabolic pathways  
451 in high-GP and no-GP axes that explain failed germination in the latter.

452 The transcriptome of no-GP axes 24 HAI largely reflects expression during early  
453 imbibition of healthy axes (3 HAI) (Fig. 6c,7a,8,9), further suggesting that axes that failed to  
454 germinate have slow or arrested metabolism. Future studies will examine no- and low-GP axes at  
455 times shorter and longer than 24 HAI to distinguish these scenarios. Slowed metabolism as a  
456 consequence of aging provides an opportunity for “rescue” by extending germinating times and  
457 preventing microbial invasion.

458

459 *Adding insult to injury*

460 Pinpointing the lethal event is confounded in seeds because damage continues to  
461 accumulate postmortem. Most 1996H seeds died by 2013 (Walters *et al.*, 2020), meaning that  
462 damage measured in 2018 was beyond the lethal event. The low RIN values in dry seeds of this  
463 cohort reflect degraded ribosomal subunits (Schroeder *et al.*, 2006), though some intact  
464 ribosomes appear present based on identifiable 18S and 25S peaks in electropherograms (Fig.  
465 S3). Poor recovery of RNA integrity 24 HAI in 1996H suggests that translation is also impaired,  
466 and *de novo* protein synthesis is needed to complete germination (Rajjou *et al.*, 2008). Possibly,  
467 imbibition time courses of proteomic changes in healthy vs. aged seeds would illuminate the  
468 relationship between translational competence and overall metabolic vigor and radicle  
469 emergence.

470 Lethal events were occurring in the 1999H cohort at the time RNA was extracted in 2018  
471 (Walters *et al.*, 2020). However, damage to rRNA (RIN values < 7) was not obvious in this cohort  
472 for dry or imbibed axes (Fig. 2,S2,S3, Table S10). In other words, some 1999H axes experienced  
473 a “death blow,” but it was not detected by loss of RNA integrity per se (Fleming *et al.*, 2017,

474 2018). More likely the lethal event is reflected by languishing metabolism upon hydration (Fig.  
475 6b).

476

477 *Are low-GP axes dead or alive?*

478 The low-GP category (Fig. 3) includes axes from both 2015H and 1999H (98-99% and  
479 60-90% germination, respectively), the latter having an approximate 2:1 ratio of green and white  
480 cotyledons after 72 hours of light. Transcriptomes of the readily-identified high-GP group likely  
481 clustered separately from the low-GP group because of less intense up- and down-regulation in  
482 low-GP axes (Fig. 6). Low-GP axes shared over 90% of their SDE genes with high-GP axes,  
483 which were expressed in the same direction but with higher  $\log_2FC$  values (note  $R^2 = 0.94$  and  
484 slope =  $1.27 > 1$ ,  $P \ll 0.01$  in Fig. 5a). The low-GP category may be more aptly named “slow  
485 germination potential” to highlight the similarity in expression patterns with healthy axes 6 or 12  
486 HAI (Bellieny-Rabelo *et al.*, 2016) (Fig. 8). Since time required for radicle emergence varies,  
487 from 22-36 HAI for 2015H to 22-50 HAI for 1999H seeds (Fig. 1a), the low-GP category may  
488 encompass the later-germinating seeds from each cohort. Low-GP seeds also may or may not be  
489 fully capable of completing germination, as evidenced by the mixture of white and green  
490 cotyledons associated with these axes. In low-GP seeds that successfully germinate, delayed  
491 transcription may catch up to match high-GP axes if given sufficient imbibition time  
492 (Waterworth *et al.*, 2019). In other words, low-GP axes may germinate, or not, depending on  
493 experimental conditions, giving high uncertainty to exact germination percentages as well as  
494 greater probability of type 1 statistical errors (accepting a seed is dead when it is not (Fig. S1).

495 Detecting an intermediate class of germination potential argues for a transition between  
496 ability and inability to germinate that is more continuous than characterizations of alive and dead  
497 or green and white cotyledons. Transcriptome size, coordinated gene expression, RNA integrity,  
498 and the extent that radicle emergence is delayed may provide usable signals that *quantify* damage  
499 in aging seeds before germination capacity is entirely lost. Assessments of seeds that are dying  
500 but retain some possibility of surviving are likely to reveal other cellular signals too. Quantitative  
501 metrics of damage are needed to phenotype segregating populations of seeds that are aging  
502 rapidly or slowly. Observing an intermediate class also provides a new framework to adjust our  
503 notions of how dry seeds die, away from catastrophic events and towards slow attrition and  
504 eventual death. Here, we find no *single* molecular failure that signals mortality. However, a  
505 threshold of metabolic competence may ultimately separate an embryo that cannot be revived



506 from one that can, when given substantial intervention to prolong imbibition and retard microbial  
507 growth.

508

### 509 Conclusion

510 Dry seeds are neither overtly alive nor dead. Imbibition initiates the process of  
511 germination, a complex developmental cascade of fluctuating gene expression that culminates  
512 (*sensu stricto*) in radicle emergence. Germination-related transcripts are detected in lethally aged  
513 seeds and self-destruct pathways are *not*, ruling out a clear metabolism-based “death signature”.  
514 Rather, the distinction between alive and recently dead appears to be kinetic. That is, dead seeds  
515 fail to muster a sufficient transcriptome response before microbial infestations dominate.  
516 Therefore, global gene expression may serve as an excellent “canary in the coal mine” to indicate  
517 seed health or imminent demise.

518

### 519 **Acknowledgements**

520 MBF was supported through the ARS postdoctoral fellowship program. USDA is an equal  
521 opportunity employer and provider.

522

### 523 **Author contributions**

524 Design of the research: MBF, ELP, CW; performance of the research: MBF; data analysis and  
525 interpretations: MBF, ELP, CW; writing the manuscript: MBF, ELP, CW.

526

### 527 **Data availability**

528 The data from the storage time experiment that support the findings of this study are openly  
529 available in the SRA database at [ncbi.nlm.nih.gov/sra](https://ncbi.nlm.nih.gov/sra), reference number PRJNA675850. The  
530 data from the imbibition time experiment that support the findings of this study were derived  
531 from resources in the public domain, available at the SRA database at [ncbi.nlm.nih.gov/sra](https://ncbi.nlm.nih.gov/sra),  
532 reference number PRJNA326110, or in the GEO database at [ncbi.nlm.nih.gov/geo/](https://ncbi.nlm.nih.gov/geo/), accession  
533 number GSE83481.

534

535

536

537

## 538 References

**AOSA (Association of Official Seed Analysts). 2012.** *AOSA rules for testing seeds*. Ithaca, NY.

**Bai B, Peviani A, van der Horst S, Gamm M, Snel B, Bentsink L, Hanson J. 2017.** Extensive translational regulation during seed germination revealed by polysomal profiling. *New Phytologist* **214**: 233-244.

**Ballesteros D, Pritchard HW, Walters C. 2020.** Dry architecture – Towards the understanding of the variation of longevity in desiccation-tolerant germplasm. *Seed Science Research* **30**: (in press).

[dataset]**Belliény-Rabelo D, DeOliveira EAG, da Silva Ribeiro E, Costa EP, Oliveira AEA, Venancio TM. 2016.** Large-scale analysis of soybean embryonic axis in five time points during germination. SRA. <https://www.ncbi.nlm.nih.gov/bioproject/PRJNA326110>

**Belliény-Rabelo D, DeOliveira EAG, da Silva Ribeiro E, Costa EP, Oliveira AEA, Venancio TM. 2016.** Transcriptome analysis uncovers key regulatory and metabolic aspects of soybean embryonic axes during germination. *Scientific reports* **6**: 36009.

**Cai, G., Kim, S. C., Li, J., Zhou, Y., & Wang, X. 2020.** Transcriptional regulation of lipid catabolism during seedling establishment. *Molecular Plant* **13**: 984-1000.

**Chen H, Osuna D, Colville L, Lorenzo O, Graeber K, Kuester H, Leubner-Metzger G., Kranner I. 2013.** Transcriptome-wide mapping of pea seed ageing reveals a pivotal role for genes related to oxidative stress and programmed cell death. *Plos one* **8**: e78471.

**Colville L, Pritchard HW. 2019.** Seed life span and food security. *New Phytologist* **224**: 557-562.

**Colville L, Bradley EL, Lloyd AS, Pritchard HW, Castle L, Kranner I. 2012.** Volatile fingerprints of seeds of four species indicate the involvement of alcoholic fermentation, lipid peroxidation, and Maillard reactions in seed deterioration during ageing and desiccation stress. *Journal of Experimental Botany* **63**: 6519–6530.

**deSouza-Vidigal D, Willems L, van Arkel J, Dekkers BJ, Hilhorst HW, Bentsink L. 2016.**

Galactinol as marker for seed longevity. *Plant Science* **246**: 112-118.

**Dirk L.M.A., Downie A.B. 2018.** An examination of Job's Rule: Protection and repair of the proteins of the translational apparatus in seeds. *Seed Science Research* **28**: 168–81.

**El-Maarouf-Bouteau H, Mazuy C, Corbineau F, Bailly C. 2011.** DNA alteration and programmed cell death during ageing of sunflower seed. *Journal of Experimental Botany* **62**: 5003-5011.

**El-Maarouf-Bouteau H, Mazuy C, Job C, Bailly C. 2013.** Role of protein and mRNA

oxidation in seed dormancy and germination. *Frontiers in plant science* **4**: 77.

[dataset]**Fleming MB, Patterson EL, Walters C. 2020.** Transcriptomes of imbibed and dry soybean embryonic axes stored for 3, 19, and 22 years. SRA.

<https://www.ncbi.nlm.nih.gov/bioproject/PRJNA675850/>

**Fleming MB, Hill LM, Walters C. 2019.** The kinetics of ageing in dry-stored seeds: a comparison of viability loss and RNA degradation in unique legacy seed collections.

*Annals of Botany* **123**: 1133-1146.

**Fleming MB, Patterson EL, Reeves PA, Richards CM, Gaines TA, Walters C. 2018.**

Exploring the fate of mRNA in aging seeds: protection, destruction, or slow decay?. *Journal of Experimental Botany* **69**: 4309-4321.

**Fleming MB, Richards CM, Walters C. 2017.** Decline in RNA integrity of dry-stored soybean seeds correlates with loss of germination potential. *Journal of Experimental Botany* **68**: 2219-2230.

**Galland M, Huguet R, Arc E, Cueff G, Job D, Rajjou L. 2014.** Dynamic proteomics emphasizes the importance of selective mRNA translation and protein turnover during Arabidopsis seed germination. *Molecular & Cellular Proteomics* **13**: 252-268.

**Kalemba EM, Pukacka S. 2014.** Carbonylated proteins accumulated as vitality decreases during long-term storage of beech (*Fagus sylvatica* L) seeds. *Trees* **28**: 503–515

**Kim D, Paggi JM, Park C, Bennett C, Salzberg SL. 2019.** Graph-based genome alignment and genotyping with HISAT2 and HISAT-genotype. *Nature biotechnology* **37**: 907-915.

**Kolde R. 2019.** pheatmap: Pretty Heatmaps. *R package version 1.0.12* <https://CRAN.R-project.org/package=pheatmap>

**Kranner I, Birtić S, Anderson KM, Pritchard HW. 2006.** Glutathione half-cell reduction potential: a universal stress marker and modulator of programmed cell death?.

*Free Radical Biology and Medicine* **40**: 2155-2165.

**Kranner I, Chen HY, Pritchard HW, Pearce SR and Birtić S. 2011.** Inter-nucleosomal DNA fragmentation and loss of RNA integrity during seed ageing. *Plant Growth Regulation* **63**: 63–72.

**Kurek K, Plitta-Michalak B and Ratajczak E. 2019.** Reactive oxygen species as potential drivers of the seed aging process. *Plants-Basel* **8**: 174.

**Leprince O, Pellizzaro A, Berriri S, Buitink J. 2017.** Late seed maturation: drying without dying. *Journal of Experimental Botany* **68**: 827-841.

**Li H, Handsaker B, Wysoker A, Fennell T, Ruan J, Homer N, Marth G, Abecasis G, Durbin R. 2009.** The sequence alignment/map format and SAMtools. *Bioinformatics* **25**: 2078-2079.

- Martin M. 2011.** Cutadapt removes adapter sequences from high-throughput sequencing reads. *EMBnet. Journal* **17**: 10-12.
- Masubelele NH, Dewitte W, Menges M, Maughan S, Collins C, Huntley R, Nieuwland J, Scofield S, Murray JA. 2005.** D-type cyclins activate division in the root apex to promote seed germination in Arabidopsis. *Proceedings of the National Academy of Sciences U S A* **102**: 15694–15699.
- McCarthy DJ, Chen Y, Smyth GK. 2012.** Differential expression analysis of multifactor RNA-Seq experiments with respect to biological variation. *Nucleic acids research* **40**: 4288-4297.
- Michalak M, Barciszewska MZ, Barciszewski J, Plitta BP and Chmielarz P. 2013.** Global changes in DNA methylation in seeds and seedlings of *Pyrus communis* after seed desiccation and storage. *PloS one* **8**: e70693.
- Mira S, Hill, LM, González-Benito ME, Ibáñez MA, Walters C. 2016.** Volatile emission in dry seeds as a way to probe chemical reactions during initial asymptomatic deterioration. *Journal of Experimental Botany* **67**: 1783-1793.
- Mira S, Nadarajan J, Liu U, González-Benito ME, Pritchard HW. 2019.** Lipid thermal fingerprints of long-term stored seeds of Brassicaceae. *Plants* **8**: 414.
- Mira S, Pirredda M, Martín-Sánchez M, Marchessi JE, Martín C. 2020.** DNA methylation and integrity in aged seeds and regenerated plants. *Seed Science Research* **30**: 1-9.
- Mohammadi H, Soltani A, Sadeghipour HR, Zeinali E. 2012.** Effects of seed aging on subsequent seed reserve utilization and seedling growth in soybean. *International Journal of Plant Production* **5**: 65-70.
- Morscher F, Kranner I, Arc E, Bailly C, Roach T. 2015.** Glutathione redox state, tocopherols, fatty acids, antioxidant enzymes and protein carbonylation in sunflower seed embryos associated with after-ripening and ageing. *Annals of Botany* **116**: 669-678.
- Nagel M, Seal E, Colville L, Rodenstein A, Un S, Richter J, Pritchard HW, Börner A, Kranner I. 2019.** Wheat seed ageing viewed through the cellular redox environment and changes in pH. *Free Radical Research* **53**: 641-654.
- Nguyen TP, Cueff G, Hegedus DD, Rajjou L, Bentsink L. 2015.** A role for seed storage proteins in Arabidopsis seed longevity. *Journal of experimental botany* **66**: 6399-6413.
- Ogé L, Bourdais G, Bove J, Collet B, Godin B, Granier F, Boutin JP, Job D, Jullien M, Grappin P. 2008.** Protein repair L-isoaspartyl methyltransferase1 is involved in both seed longevity and germination vigor in Arabidopsis. *The Plant Cell* **20**: 3022-3037.
- Pereira-Lima JJ, Buitink J, Lalanne D, et al. 2017.** Molecular characterization of the

acquisition of longevity during seed maturation in soybean. *PLoS One* **12**: e0180282.

**Rajjou L, Duval M, Gallardo K, Catusse J, Bally J, Job C, Job D. 2012.** Seed germination and vigor. *Annual review of plant biology* **63**: 507-533.

**Rajjou L, Lovigny Y, Groot SP, Belghazi M, Job C, Job D. 2008.** Proteome-wide characterization of seed aging in Arabidopsis: a comparison between artificial and natural aging protocols. *Plant Physiology* **148**: 620-641.

**R Core Team. 2018.** R: A language and environment for statistical computing. *R Foundation for Statistical Computing*

**Robinson MD, McCarthy DJ, Smyth GK. 2010.** edgeR: a Bioconductor package for differential expression analysis of digital gene expression data. *Bioinformatics* **26**: 139-140.

**Rosental L, Nonogaki H, Fait A. 2014.** Activation and regulation of primary metabolism during seed germination. *Seed Science Research* **24**: 1–15.

**Sano N, Rajjou L, North HM, 2020.** Lost in translation: Physiological roles of stored mRNAs in seed germination. *Plants* **9**: 347.

**Sano N, Rajjou L, North HM, Debeaujon I, Marion-Poll A, Seo M. 2016.** Staying alive: molecular aspects of seed longevity. *Plant and Cell Physiology* **57**: 660-674.

**Sattler SE, Gilliland LU, Magallanes-Lundback M, Pollard M, DellaPenna D. 2004.** Vitamin E is essential for seed longevity and for preventing lipid peroxidation during germination. *The plant cell* **16**: 1419-1432.

**Schroeder A, Mueller O, Stocker S, Salowsky R, Leiber M, Gassmann M, Lightfoot S, Menzel W, Granzow M, Ragg T. 2006.** The RIN: an RNA integrity number for assigning integrity values to RNA measurements. *BMC molecular biology* **7**: 1-14.

**Schwacke R, Ponce-Soto GY, Krause K, Bolger AM, Arsova B, Hallab A, Gruden K, Stitt M, Bolger ME, Usadel B. 2019.** MapMan4: a refined protein classification and annotation framework applicable to multi-omics data analysis. *Mol Plant*. **12**: 879-892

**Smith MT, Berjak P. 1995.** Deteriorative changes associated with the loss of viability of stored desiccation-tolerant and desiccation-sensitive seeds. *In: Seed Development and Germination eds( Kigel and Galili)* pp. 701-746.

**Solberg SØ, Yndgaard F, Andreassen C, von Bothmer R, Loskutov IG, Asdal Å., 2020.** Long-term storage and longevity of orthodox seeds: A systematic review. *Frontiers in Plant Science* **11**: 1007.

**Tejedor-Cano, J., Prieto-Dapena, P., Almoguera, C., Carranco, R., Hiratsu, K., Ohme-Takagi, M., Jordano, J. 2010.** Loss of function of the HSFA9 seed longevity program. *Plant. Cell Environ* **33**: 1408–1417.

**Terskikh VV, Zeng Y, Feurtado JA, Giblin M, Abrams SR, Kermodé AR. 2008.**

Deterioration of western redcedar (*Thuja plicata* Donn ex D Don) seeds: protein oxidation and in vivo NMR monitoring of storage oils. *Journal of experimental botany* **59**: 765-777.

**Thimm O, Bläsing O, Gibon Y, Nagel A, Meyer S, Krüger P, Selbig J, Müller LA, Rhee SY, Stitt M. 2004.** MAPMAN: a user-driven tool to display genomics data sets onto diagrams of metabolic pathways and other biological processes. *The Plant Journal* **37**: 914-939.

**Veselova TV, Veselovsky VA, Obroucheva NV. 2015.** Deterioration mechanisms in air-dry pea seeds during early aging. *Plant Physiology and Biochemistry* **87**: 133-139.

**Walters C, Fleming MB, Hill LM, Dorr EJ, Richards CM. 2020.** Stress-response relationships related to aging and death of orthodox seeds: A study comparing viability and RNA integrity in soybean (*Glycine max*) cv Williams 82. *Seed Science Research* **30**: 161-172.

**Walters C. 1998.** Understanding the mechanisms and kinetics of seed aging. *Seed Science Research* **8**: 223-244.

**Wang Y, Li Y, Xue H, Pritchard HW, Wang X. 2015.** Reactive oxygen species-provoked mitochondria-dependent cell death during ageing of elm (*Ulmus pumila* L) seeds. *The Plant Journal* **81**: 438-452.

**Waterworth WM, Bray CM, West CE. 2015.** The importance of safeguarding genome integrity in germination and seed longevity. *Journal of Experimental Botany* **66**: 3549-3558.

**Waterworth WM, Bray CM, West CE. 2019.** Seeds and the art of genome maintenance. *Frontiers in Plant Science* **10**: 706.

**Waterworth WM, Footitt S, Bray CM, Finch-Savage WE, West CE 2016.** DNA damage checkpoint kinase ATM regulates germination and maintains genome stability in seeds. *Proceedings of the National Academy of Sciences USA* **113**: 9647-9652.

**Waterworth WM, Masnavi G, Bhardwaj RM, Jiang Q, Bray CM, West CE. 2010.** A plant DNA ligase is an important determinant of seed longevity. *The Plant Journal* **63**: 848-860

**Whittle, CA, Beardmore T, Johnston MO. 2001.** Is G1 Arrest in Plant Seeds Induced by a P53-Related Pathway?. *Trends in Plant Science* **6**: 248-251.

**Wiebach J, Nagel M, Börner A, Altmann T and Riewe D. 2020.** Age-dependent loss of seed viability is associated with increased lipid oxidation and hydrolysis. *Plant Cell & Environment* **4**: 303-314 <https://doi.org/10.1111/pce.13651>

**Xin X, Tian Q, Yin G, Chen X, Zhang J, Ng S, and Lu X. 2014.** Reduced mitochondrial and ascorbate-glutathione activity after artificial ageing in soybean seed. *Journal of Plant*

*Physiology* **171**: 140–147. p. <https://doi.org/10.1016/j.jplph.2013.09.016>

**Yazdanpanah F, Hanson J, Hilhorst HWM and Bentsink L. 2017.** Differentially expressed genes during the imbibition of dormant and after-ripened seeds—A reverse genetics approach. *BMC Plant Biology* **17**:

151. <https://doi.org/10.1186/s12870-017-1098-z>

**Yin G, Xin X, Fu S, An M, Wu S, Chen X, Zhang J, He J, Whelan J, Lu X. 2017.** Proteomic and carbonylation profile analysis at the critical node of seed ageing in *Oryza sativa*. *Scientific reports* **7**: 1-12.

**Yin X, Wang X, Komatsu S. 2018.** Phosphoproteomics: Protein phosphorylation in regulation of seed germination and plant growth. *Current Protein and Peptide Science* **19**: 401-412.

**Zhao L, Wang S, Fu YB, Wang H. 2020.** Arabidopsis seed stored mRNAs are degraded constantly over aging time, as revealed by new quantification methods. *Frontiers in plant science* **10**: 1764.

**Zhou W, Chen F, Luo X, Dai Y, Yang Y, Zheng C, Yang W, Shu K. 2020.** A matter of life and death: Molecular, physiological, and environmental regulation of seed longevity. *Plant Cell & Environment* **43**: 293-302.

**Zhou W, Chen, F, Zhao S, Yang C, Meng Y, Shuai H, ... Shu K 2019.** DA6 promotes germination and seedling establishment from aged soybean seeds by mediating fatty acid metabolism and glycometabolism. *Journal of Experimental Botany* **70**: 101–114.  
<https://doi.org/10.1093/jxb/ery247>

**Zinsmeister J, Leprince O, Buitink J. 2020.** Molecular and environmental factors regulating seed longevity. *Biochemical Journal* **477**: 305-323.

## 540 **Figure Legends**

541 **Figure 1.** Markers of germination capacity in imbibing soybean (cv. ‘Williams 82’) seeds  
542 harvested in 2015 (filled circles), 1999 (open circles, dashed curve) and 1996 (filled squares).  
543 Data reflect % radicle emergence (**a**), axis water content (**b**), and axis fresh (**c**) and dry (**d**) mass  
544 measured at indicated times for separate damp paper towel rolls containing 20-30 seeds  
545 incubated at 25C. The dotted vertical line indicates timing of RNA extraction of isolated axes  
546 and light exposure of corresponding cotyledons.

547  
548 **Figure 2.** RNA integrity, as measured by RIN (Schroeder *et al.*, 2006) of five excised embryonic  
549 axes from different soybean (cv. ‘Williams 82’) cohorts imbibed for 24 hours. Shaded boxes  
550 represent the proportion of 100, 200, and 100 axes for 2015H, 1999H and 1996H cohorts,  
551 respectively, in which corresponding cotyledons greened (indicating positive germination  
552 capacity of axes). Values in each bar represent the average RIN  $\pm$  std deviation for each cohort  
553 and viability class. RINs marked with different superscript letters are significantly different at  $p$   
554  $< 0.05$ ) (see Table **S2** for details).

555  
556 **Figure 3.** A multi-dimensional scaling (MDS) plot summarizing relationships between  
557 transcriptomes, where each point represents the transcriptome from a single dry (blue symbols)  
558 or imbibed (green or brown symbols) soybean (cv. ‘Williams 82’) embryonic axis, and proximity  
559 indicates higher similarity. Imbibed axes have corresponding cotyledons that did or did not  
560 green, indicated by green and brown symbols, respectively. Seed cohort is represented by circles  
561 (2015H), triangles (1999H) and squares (1996H). Axes clearly separated based on dry/imbibed.  
562 Imbibed axes sorted into three groups based on cotyledon color, interpreted as representing the  
563 entire seed’s likely germination potential (GP): all white cotyledons (no-GP), all green  
564 cotyledons (high-GP), and a mixture of white and green cotyledons (low-GP).

565  
566 **Figure 4.** Venn diagram of transcripts significantly ( $|\log_2FC| > 2$  and  $p < 0.001$ ) differentially  
567 expressed in soybean (cv. ‘Williams 82’) axes from different cohorts 24 hours after imbibition  
568 compared to dry axes from all cohorts. A total of 19,340 transcripts were differentially expressed  
569 in at least one germination potential (GP) category, indicated by clusters in Fig. **3**. High-GP axes  
570 had the largest number of differentially expressed transcripts, and no-GP axes had the fewest.  
571 The majority of transcripts differentially expressed in no-GP axes were identified in all GP



572 categories. Low-GP axes had an intermediate number of differentially expressed transcripts,  
573 most of which were shared among high- and no-GP axes.

574

575 **Figure 5.** Correlations between intensity of expression ( $\log_2FC$ ) of significantly differentially  
576 expressed soybean genes shared between different germination potential (GP) categories: 10,663  
577 genes shared between high- and low-GP (**a**), 3416 genes shared between high- and no-GP (**b**)  
578 and 3073 genes shared between low- and no-GP axes (**c**). The equation for the regression line  
579 and the correlation coefficient for each relationship are indicated. All relationships are significant  
580 at  $P \ll 0.01$ . Slopes between regression lines in (**a**) and (**b**) are not significantly different ( $P >$   
581  $0.05$ ), but the slope of the regression line in (**c**) is significantly different from the slopes in (**a**)  
582 and (**b**) ( $P < 0.05$ ). Of note are the number of genes in the upper left and lower right quadrants in  
583 (**b**) and (**c**), indicating opposite regulation of these genes in no-GP axes that lowers the  
584 correlation coefficient.

585

586 **Figure 6.** Mapman displays of genes significantly differentially expressed (SDE) in high  
587 germination potential (GP) (**a**), low-GP (**b**) and no-GP (**c**) soybean (cv. 'Williams 82') axes.  
588 Various gray shapes represent metabolism categories and red and blue squares represent up- and  
589 down-regulation of SDE genes, respectively. Intensity of color represents  $|\log_2FC|$  with light  
590 pink or blue indicating  $|\log_2FC| = 2$  and most intense color indicating  $|\log_2FC| = 8$ . High-GP axes  
591 (**a**) show high  $|\log_2FC|$  values in several metabolism categories that is absent from no-GP axes  
592 (**c**) and intermediate in low-GP axes (**b**). Metabolism categories discussed in the text are noted  
593 with a dashed outline.

594

595 **Figure 7.** Mapman displays of genes significantly differentially expressed (SDE) in imbibed  
596 compared to dry soybean (cv. 'BRS 284') axes at sequential imbibition times based on data from  
597 Bellieny-Rabelo et al. (2016), illustrating increased expression at 3 hours after imbibition (HAI)  
598 (**a**), 6 HAI (**b**), 12 HAI (**c**) and 24 HAI (**d**). As with Fig. 6, red and blue squares represent up-  
599 and down-regulation of SDE genes, respectively. Intensity of color represents  $|\log_2FC|$  between 2  
600 and 8.

601

602 **Figure 8.** Heat map of all 19,340 transcripts significantly ( $|\log_2FC| > 2$ ,  $p < 0.001$ ) differentially  
603 expressed in any germination potential (GP) category (compared to dry soybean cv. Williams 82  
604 axes) that were also expressed at all four imbibition time-points [3, 6, 12, and 24 hours after

605 imbibition (HAI)].  $\log_2FC$  values were corrected by z-score independently for GP categories  
606 and imbibition time-points. Rows were clustered by expression profile in the three GP  
607 categories; columns were clustered by expression profile in all seven treatments. Six major  
608 clusters were observed among transcripts; three clusters were observed among treatments. No-,  
609 low- and high-GP axes clustered independently from each other; increasing GP was associated  
610 with longer imbibition times. Generally, intensity of expression was opposite in no-GP/3 HAI  
611 axes compared to high-GP/24 HAI axes, while expression in low-GP/6 HAI/12 HAI axes was  
612 intermediate.

613  
614 **Figure 9.** Heat map of z-score-corrected  $\log_2FC$  for 5712 transcripts involved in germination  
615 (see Supplemental Table 7), ordered on the y-axis by annotation and decreasing z-score in no-GP  
616 soybean axes, and clustered on the x-axis by expression profile.  $\log_2FC$  values were corrected  
617 by z-score independently for GP categories and imbibition time-points. Genes were significantly  
618 differentially expressed in at least one of the GP categories. The same patterns observed in Fig. 8  
619 were seen here also: GP categories did not cluster together, and increasing GP was associated  
620 with increased imbibition time; opposite expression intensity was found in no-GP/3 HAI versus  
621 high-GP/24 HAI, while low-GP/12 HAI/6 HAI axes were intermediate. No misregulation of  
622 germination genes in no- or low-GP categories compared to their early imbibition counterparts  
623 was apparent.

624

### 625 **Supporting Information**

626 **Figure S1** Reliability of the cotyledon greening assay in predicting germination capacity of  
627 soybean (cv. 'Williams 82') axes used for transcriptome sequencing.

628

629 **Figure S2** Electropherograms as well as associated cotyledons for total RNA extracted from  
630 soybean (cv. 'Williams 82') axes from 2015H and 1999H cohorts imbibed for 24 hours.

631

632 **Figure S3** Electropherograms for total RNA extracted from soybean (cv. 'Williams 82') axes  
633 from the 1996H cohort, as well as the cotyledons associated with those axes imbibed for 24  
634 hours.

635

636 **Figure S4** Number of transcripts significantly differentially expressed in soybean (cv. 'BRS  
637 284') axes imbibed for 3, 6, 12, and 24 hours, when compared to dry axes.

638

639 **Table S1** All transcripts from the soybean v.4 transcriptome and their MapMan bin assignments  
640 from Mercator4 v.2, used to make Fig. 6,7,9

641

642 **Table S2** RIN of each soybean (cv. ‘Williams 82’) embryonic axis used for transcriptome  
643 sequencing

644

645 **Table S3** Counts for all transcripts in the soybean v.4 transcriptome from soybean (cv. ‘Williams  
646 82’) dry and imbibed axes harvested in 2015, 1999, and 1996 (‘storage time experiment’)

647

648 **Table S4** Differential expression of all expressed transcripts in soybean (cv. ‘Williams 82’)  
649 imbibed axes from each germination potential category, compared to all dry ‘Williams 82’ axes

650

651 **Table S5** Counts for all transcripts in the soybean v.4 transcriptome from soybean (cv. ‘BRS  
652 284’) axes imbibed for 0, 3, 6, 12, and 24 hours (‘imbibition time experiment’)

653

654 **Table S6** Differential expression of all expressed transcripts in soybean (cv. ‘BRS 284’) axes  
655 from each imbibition time point, compared to all dry ‘BRS 284’ axes

656

657 **Table S7** Transcript ID, MapMan annotation, and cluster assignment for all soybean transcripts  
658 in each of the six clusters identified in Fig. 8

659

660 **Table S8** Overrepresentation analysis of MapMan annotations found in each of the six clusters  
661 identified in Fig. 8

662

663 **Table S9** Annotation, transcript ID, and log<sub>2</sub>FC of all 5760 soybean ‘germination transcripts’  
664 identified from the literature

665

666 **Table S10** Normalized log<sub>2</sub>FC values of all soybean ‘germination transcripts’ significantly  
667 differentially expressed in at least one germination potential category, used to generate Fig. 9

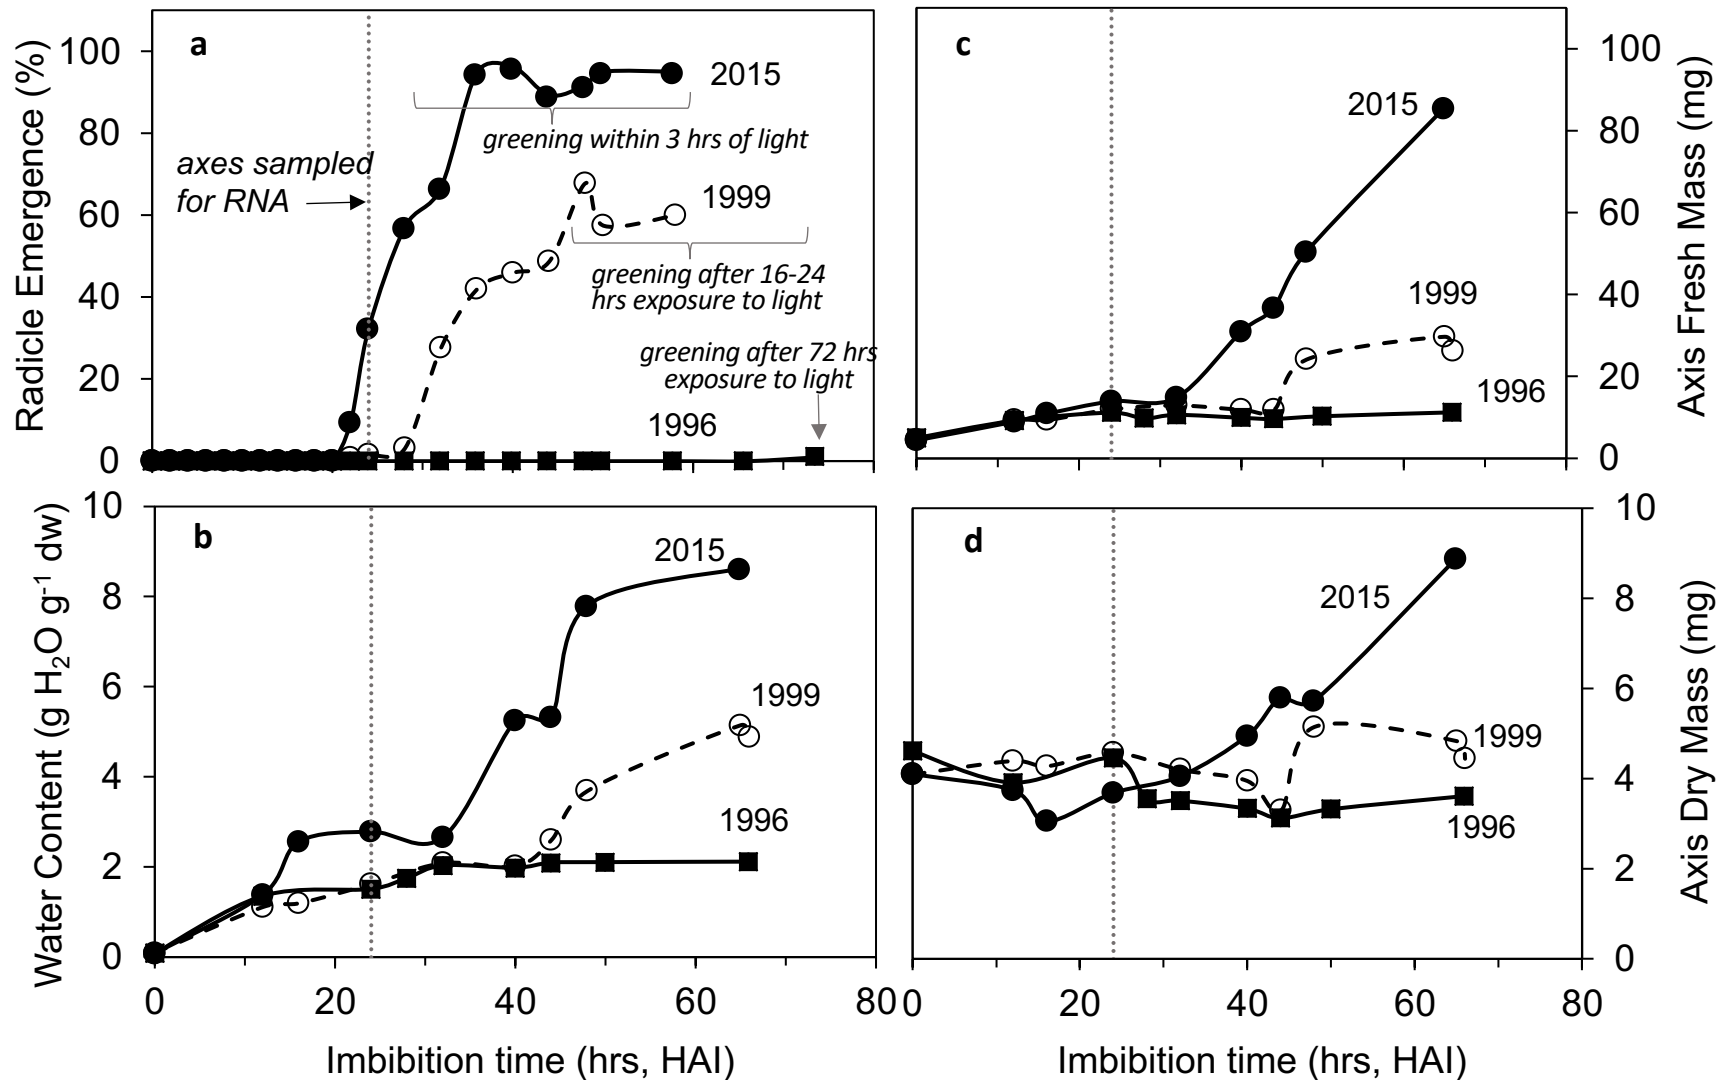

Figure 1. Markers of germination capacity in imbibing soybean (cv. 'Williams 82') seeds harvested in 2015 (filled circles), 1999 (open circles, dashed curve) and 1996 (filled squares). Data reflect % radicle emergence (a), axis water content (b), and axis fresh (c) and dry (d) mass measured at indicated times for separate damp paper towel rolls containing 20-30 seeds incubated at 25C. The dotted vertical line indicates timing of RNA extraction of isolated axes and light exposure of corresponding cotyledons.

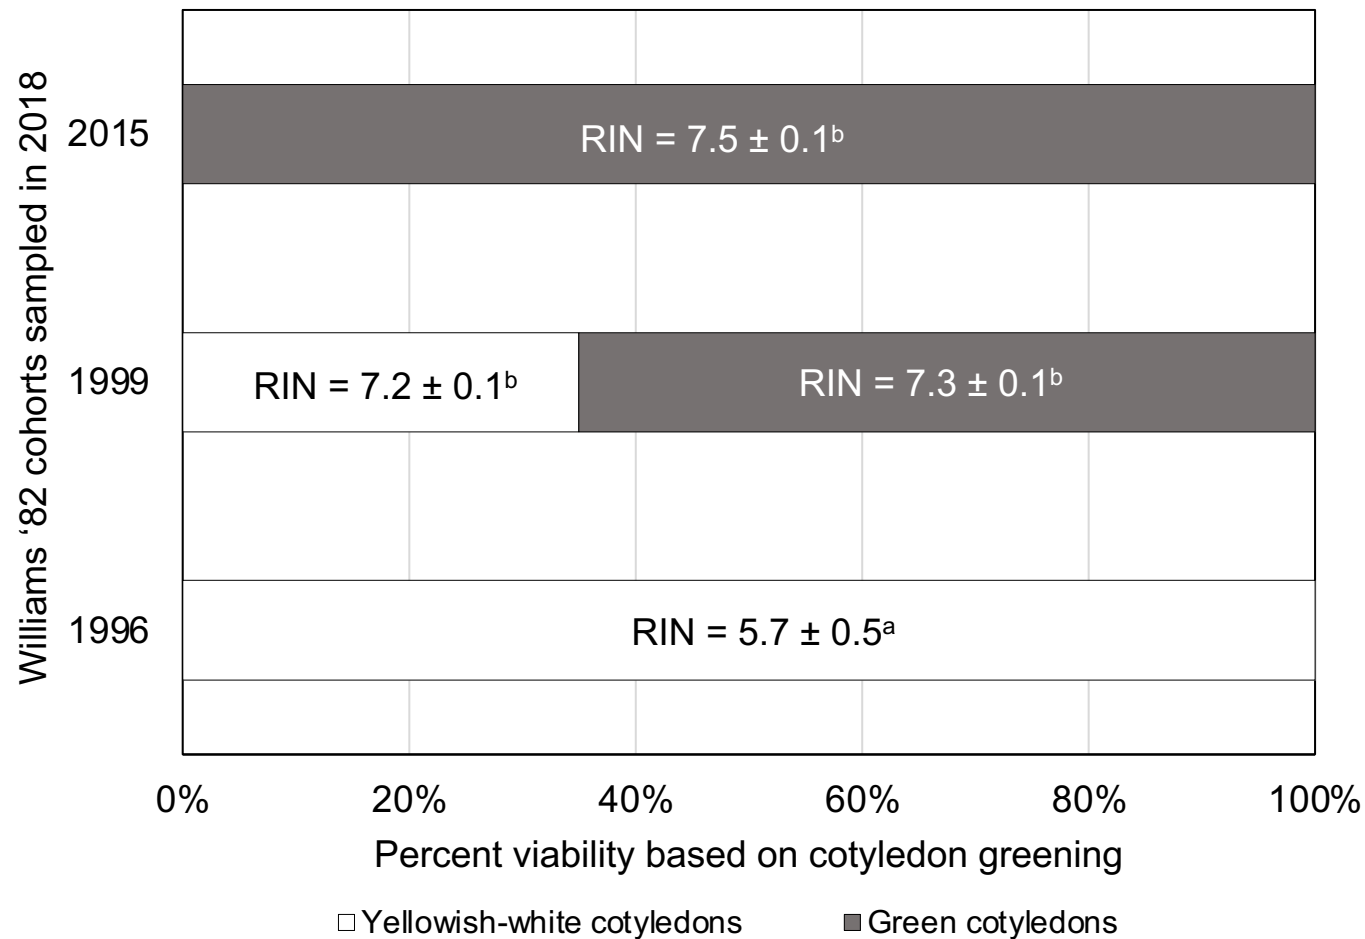

Figure 2. RNA integrity, as measured by RIN (Schroeder *et al.*, 2006) of five excised embryonic axes from different soybean (cv. 'Williams 82') cohorts imbibed for 24 hours. Shaded boxes represent the proportion of 100, 200, and 100 axes for 2015H, 1999H and 1996H cohorts, respectively, in which corresponding cotyledons greened (indicating positive germination capacity of axes). Values in each bar represent the average RIN ± std deviation for each cohort and viability class. RINs marked with different superscript letters are significantly different at  $p < 0.05$  (see Table **S2** for details).

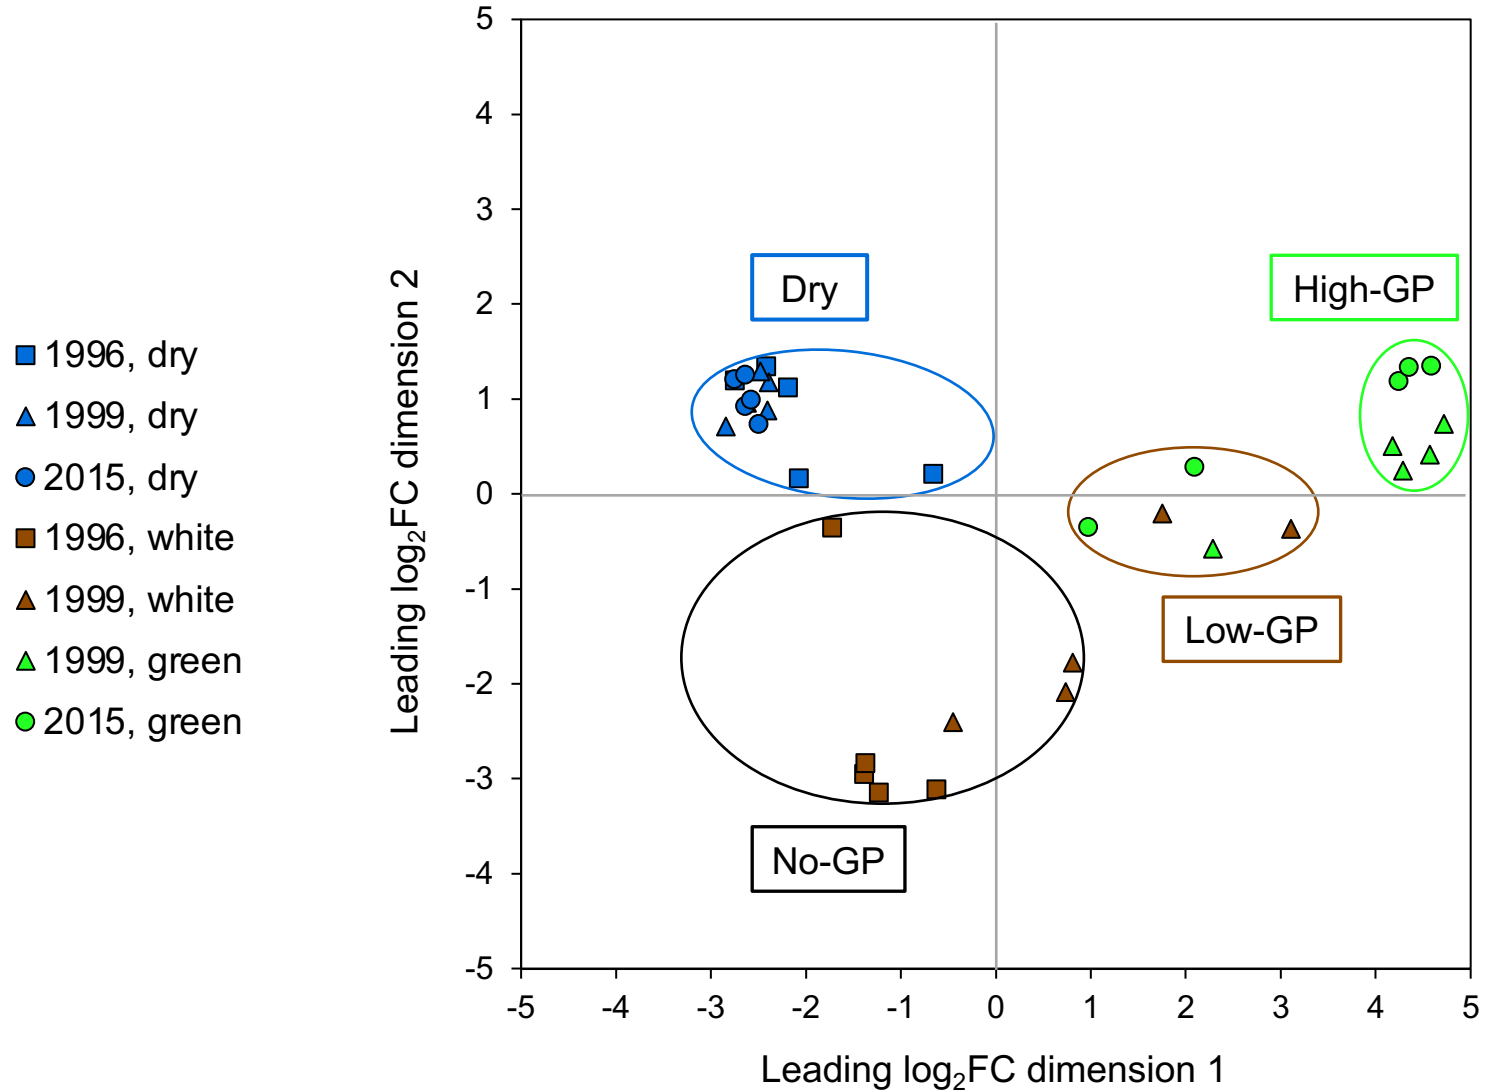

Figure 3. A multi-dimensional scaling (MDS) plot summarizing relationships between transcriptomes, where each point represents the transcriptome from a single dry (blue symbols) or imbibed (green or brown symbols) soybean (cv. ‘Williams 82’) embryonic axis, and proximity indicates higher similarity. Imbibed axes have corresponding cotyledons that did or did not green, indicated by green and brown symbols, respectively. Seed cohort is represented by circles (2015H), triangles (1999H) and squares (1996H). Axes clearly separated based on dry/imbibed. Imbibed axes sorted into three groups based on cotyledon color, interpreted as representing the entire seed’s likely germination potential (GP): all white cotyledons (no-GP), all green cotyledons (high-GP), and a mixture of white and green cotyledons (low-GP).

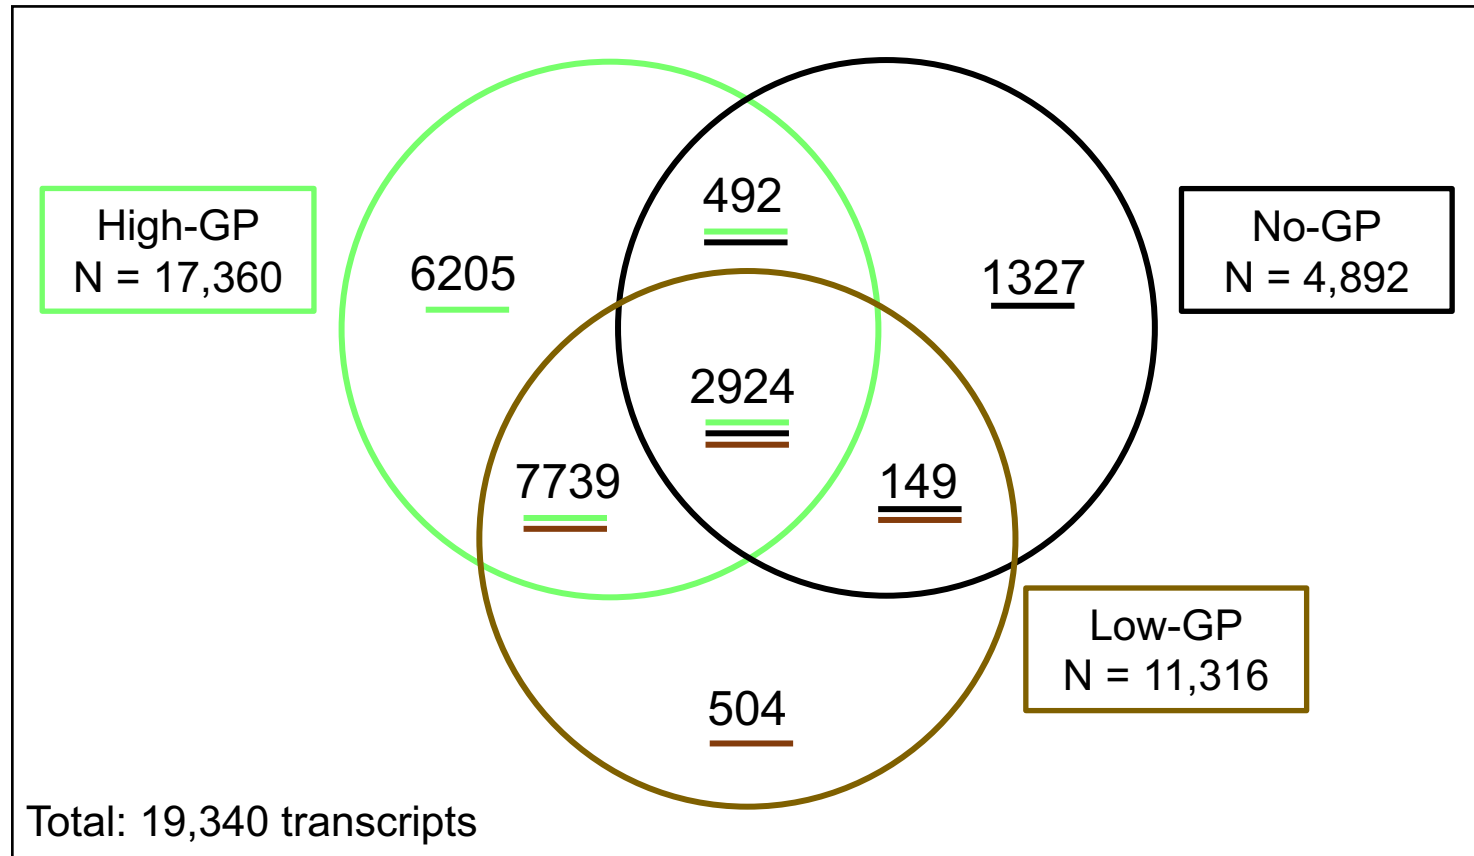

Figure 4. Venn diagram of transcripts significantly ( $|\log_2FC| > 2$  and  $p < 0.001$ ) differentially expressed in soybean (cv. 'Williams 82') axes from different cohorts 24 hours after imbibition compared to dry axes from all cohorts. A total of 19,340 transcripts were differentially expressed in at least one germination potential (GP) category, indicated by clusters in Fig. 3. High-GP axes had the largest number of differentially expressed transcripts, and no-GP axes had the fewest. The majority of transcripts differentially expressed in no-GP axes were identified in all GP categories. Low-GP axes had an intermediate number of differentially expressed transcripts, most of which were shared among high- and no-GP axes.

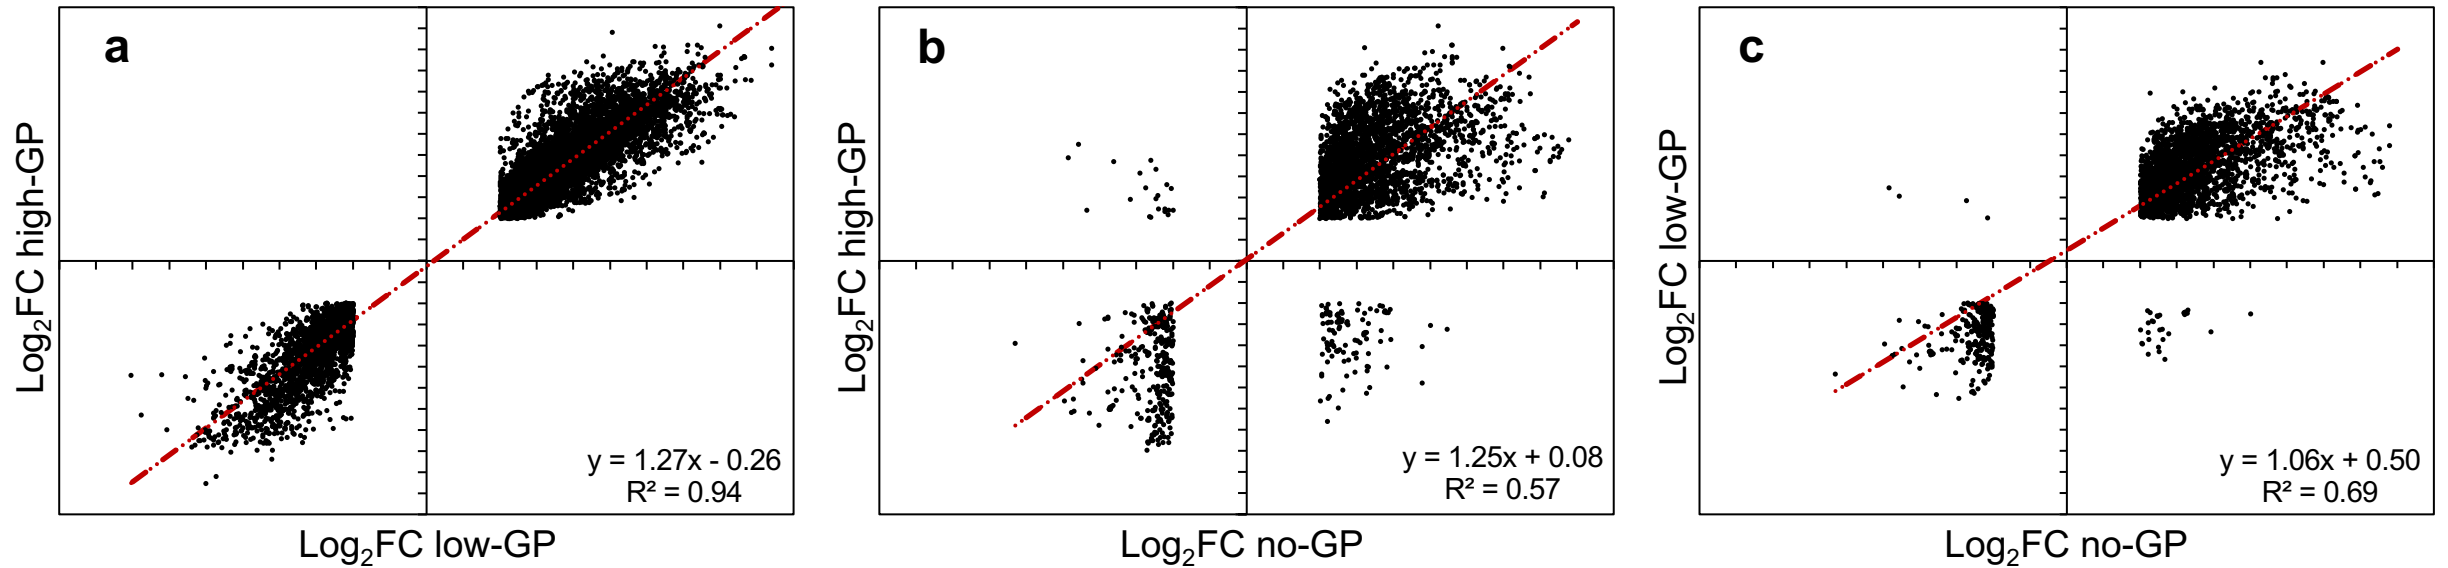

Figure 5. Correlations between intensity of expression ( $\log_2FC$ ) of significantly differentially expressed soybean genes shared between different germination potential (GP) categories: 10,663 genes shared between high- and low-GP (a), 3416 genes shared between high- and no-GP (b) and 3073 genes shared between low- and no-GP axes (c). The equation for the regression line and the correlation coefficient for each relationship are indicated. All relationships are significant at  $P < 0.01$ . Slopes between regression lines in (a) and (b) are not significantly different ( $P > 0.05$ ), but the slope of the regression line in (c) is significantly different from the slopes in (a) and (b) ( $P < 0.05$ ). Of note are the number of genes in the upper left and lower right quadrants in (b) and (c), indicating opposite regulation of these genes in no-GP axes that lowers the correlation coefficient.



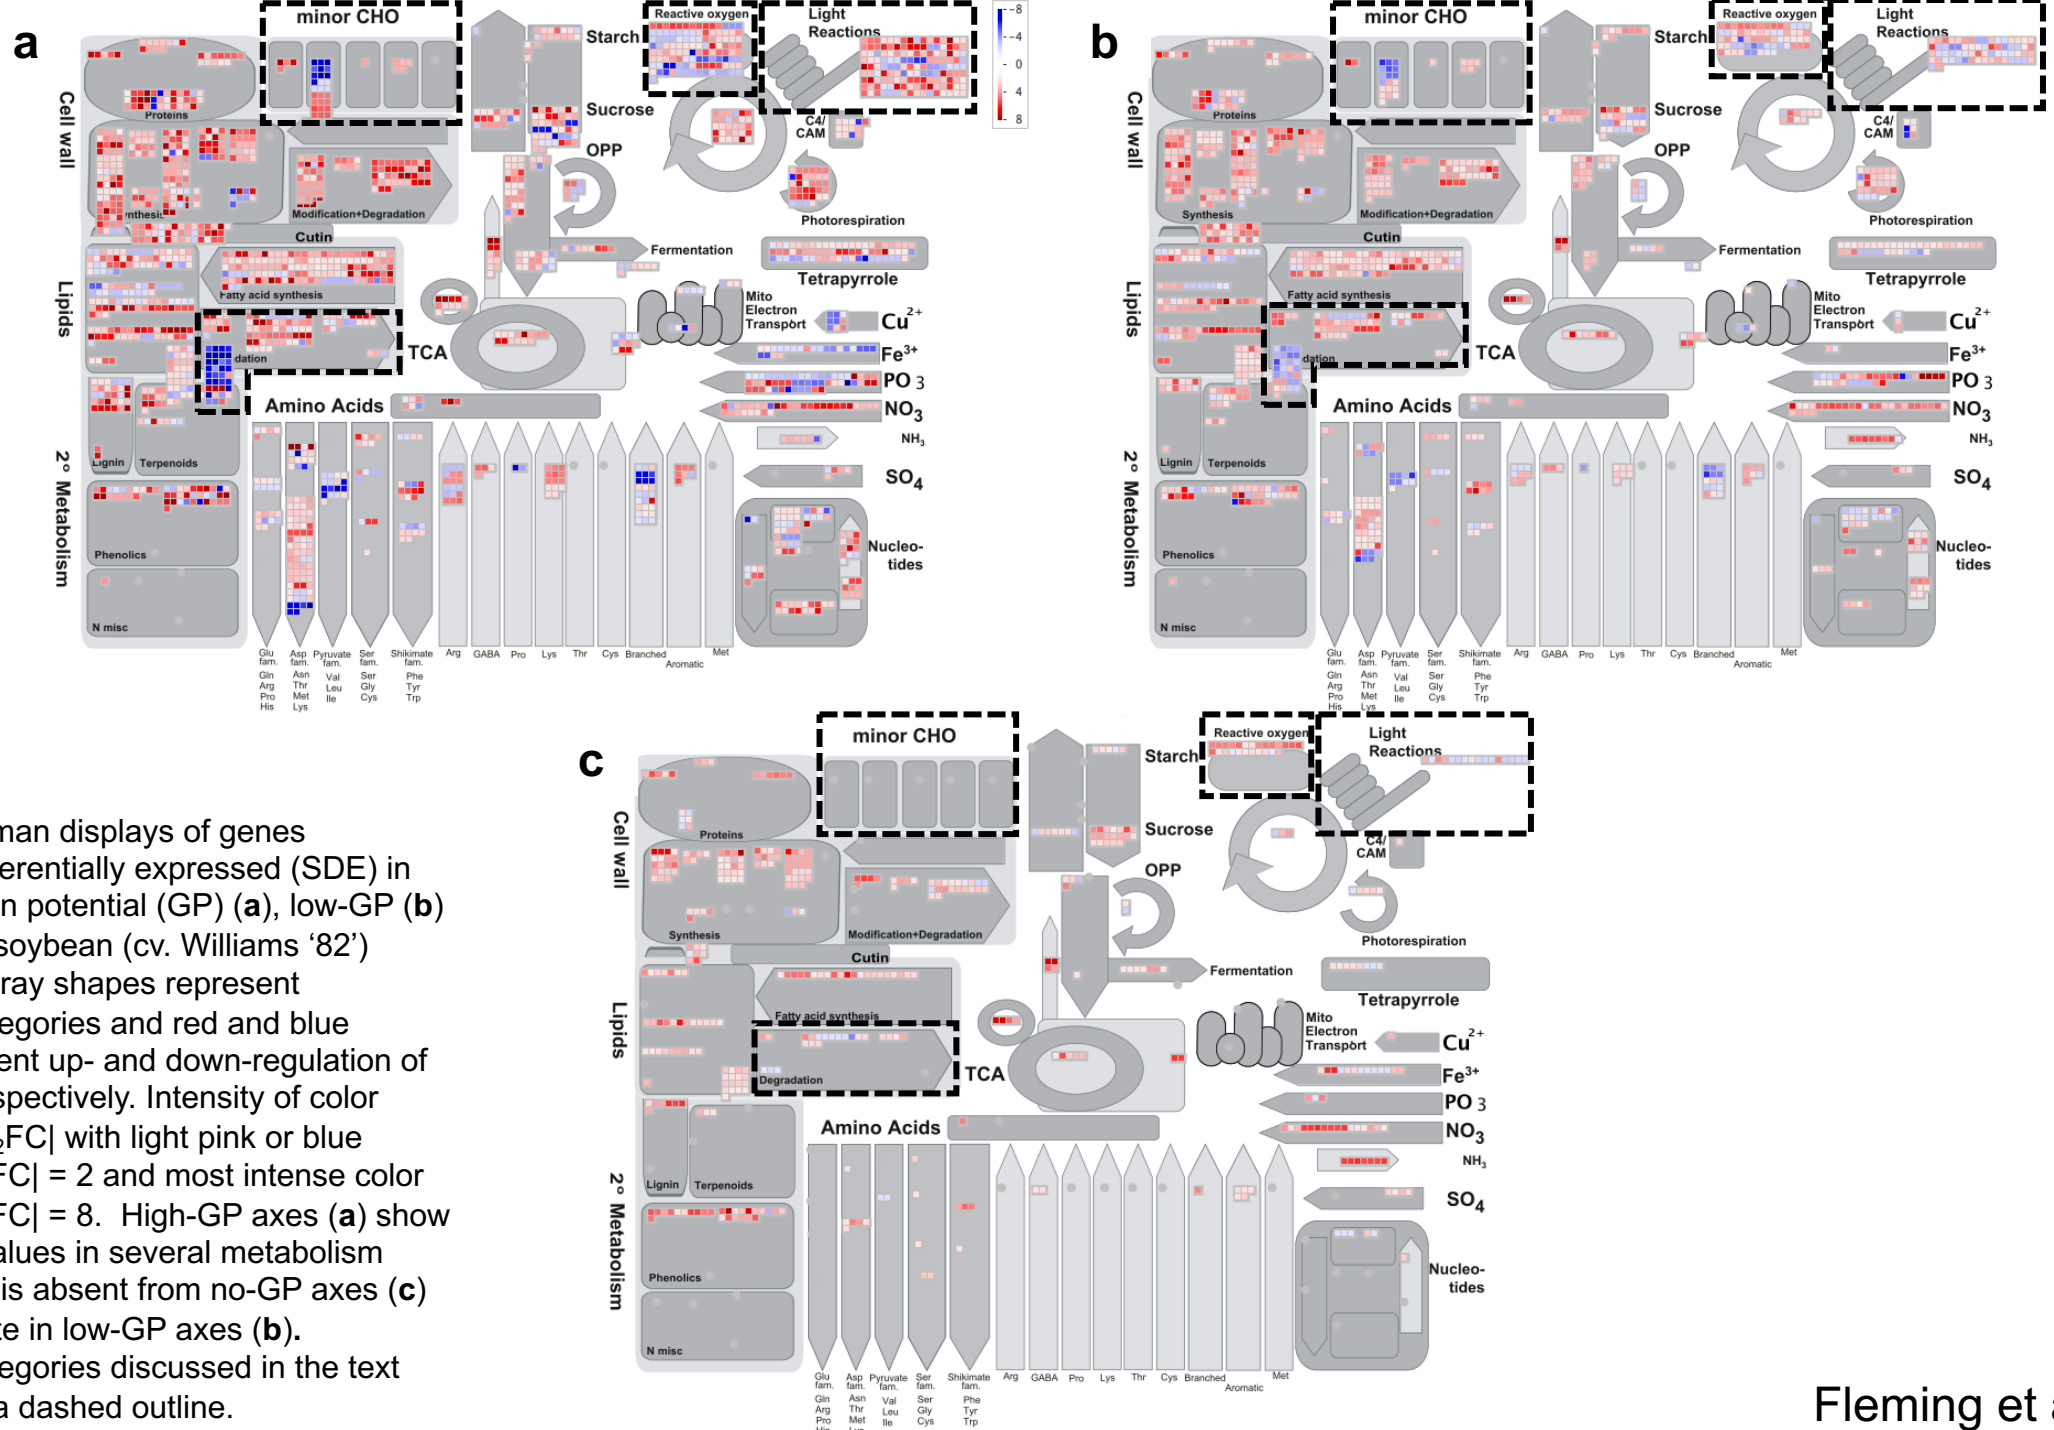

Figure 6. Mapman displays of genes significantly differentially expressed (SDE) in high germination potential (GP) (a), low-GP (b) and no-GP (c) soybean (cv. Williams '82') axes. Various gray shapes represent metabolism categories and red and blue squares represent up- and down-regulation of SDE genes, respectively. Intensity of color represents  $|\log_2FC|$  with light pink or blue indicating  $|\log_2FC| = 2$  and most intense color indicating  $|\log_2FC| = 8$ . High-GP axes (a) show high  $|\log_2FC|$  values in several metabolism categories that is absent from no-GP axes (c) and intermediate in low-GP axes (b). Metabolism categories discussed in the text are noted with a dashed outline.

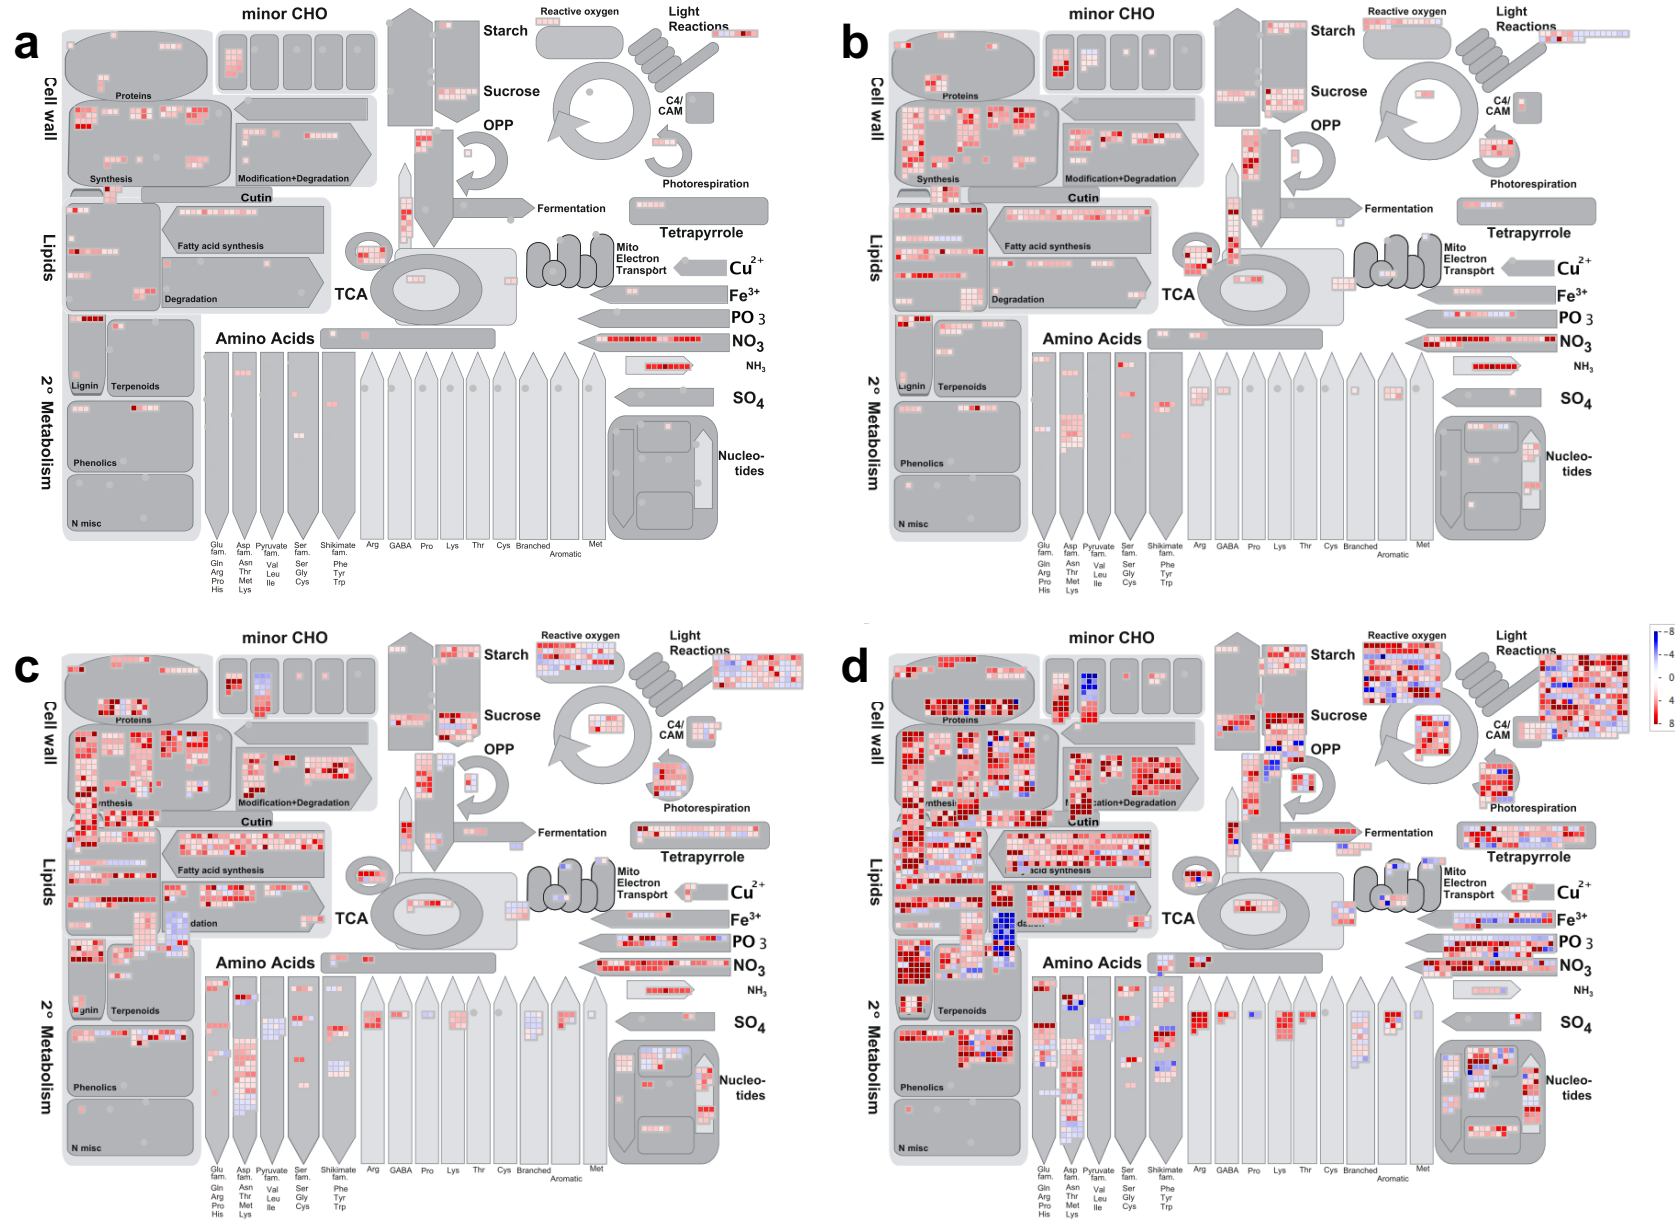

Figure 7. Mapman displays of genes significantly differentially expressed (SDE) in imbibed compared to dry soybean (cv. 'BRS 284') axes at sequential imbibition times based on data from Bellieny-Rabelo et al. (2016), illustrating increased expression at 3 hours after imbibition (HAI) (a), 6 HAI (b), 12 HAI (c) and 24 HAI (d). As with Fig. 6, red and blue squares represent up- and down-regulation of SDE genes, respectively. Intensity of color represents  $|\log_2FC|$  between 2 and 8.

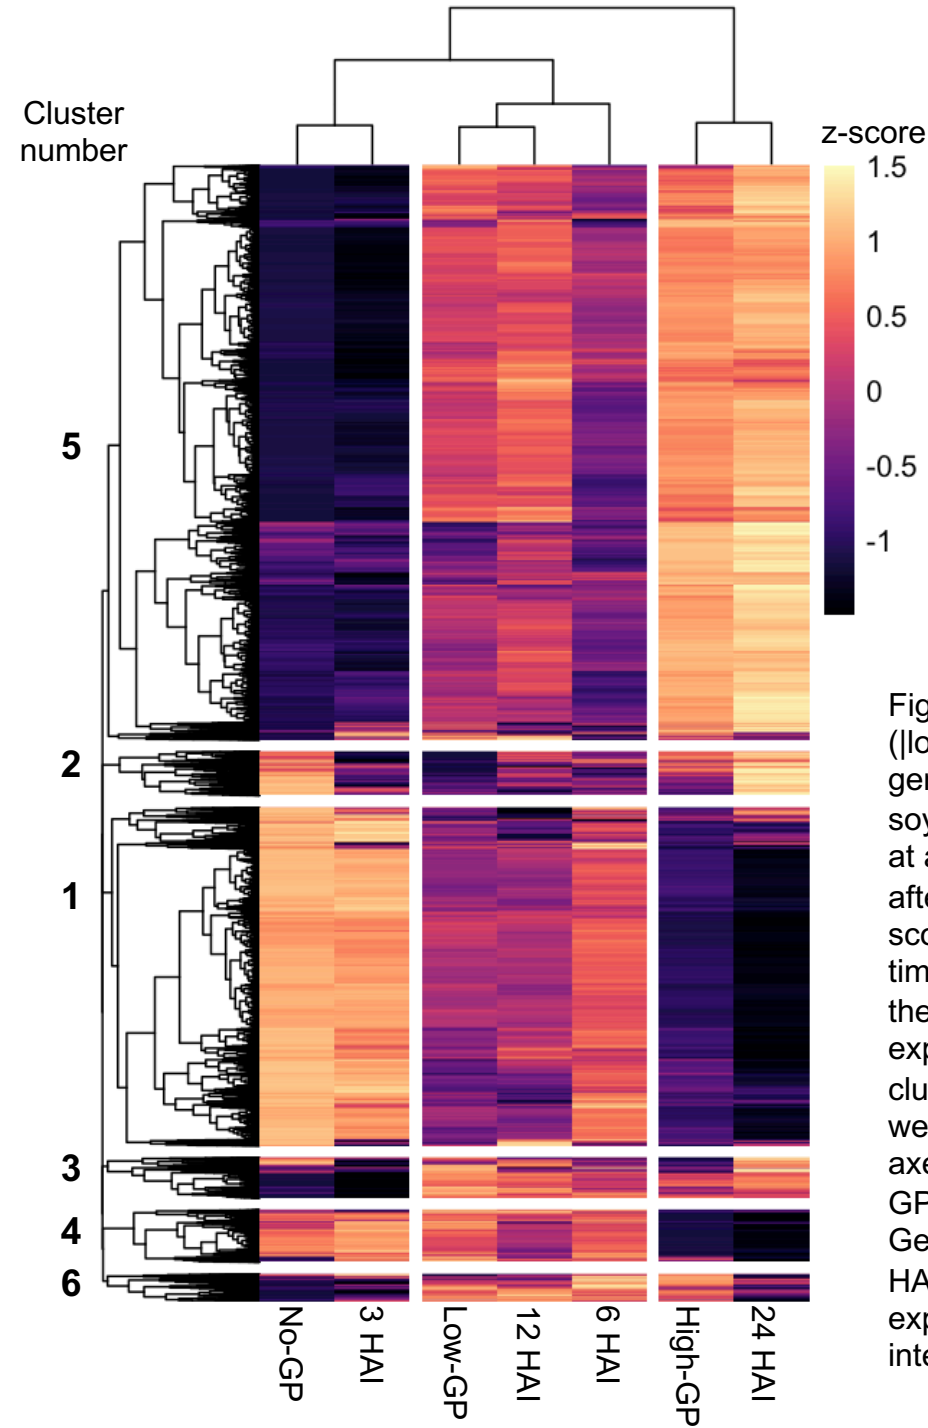

Figure 8. Heat map of all 19,340 transcripts significantly ( $|\log_2FC| > 2$ ,  $p < 0.001$ ) differentially expressed in any germination potential (GP) category (compared to dry soybean cv. Williams 82 axes) that were also expressed at all four imbibition time-points [3, 6, 12, and 24 hours after imbibition (HAI)].  $\log_2FC$  values were corrected by z-score independently for GP categories and imbibition time-points. Rows were clustered by expression profile in the three GP categories; columns were clustered by expression profile in all seven treatments. Six major clusters were observed among transcripts; three clusters were observed among treatments. No-, low- and high-GP axes clustered independently from each other; increasing GP was associated with longer imbibition times. Generally, intensity of expression was opposite in no-GP/3 HAI axes compared to high-GP/24 HAI axes, while expression in low-GP/6 HAI/12 HAI axes was intermediate.

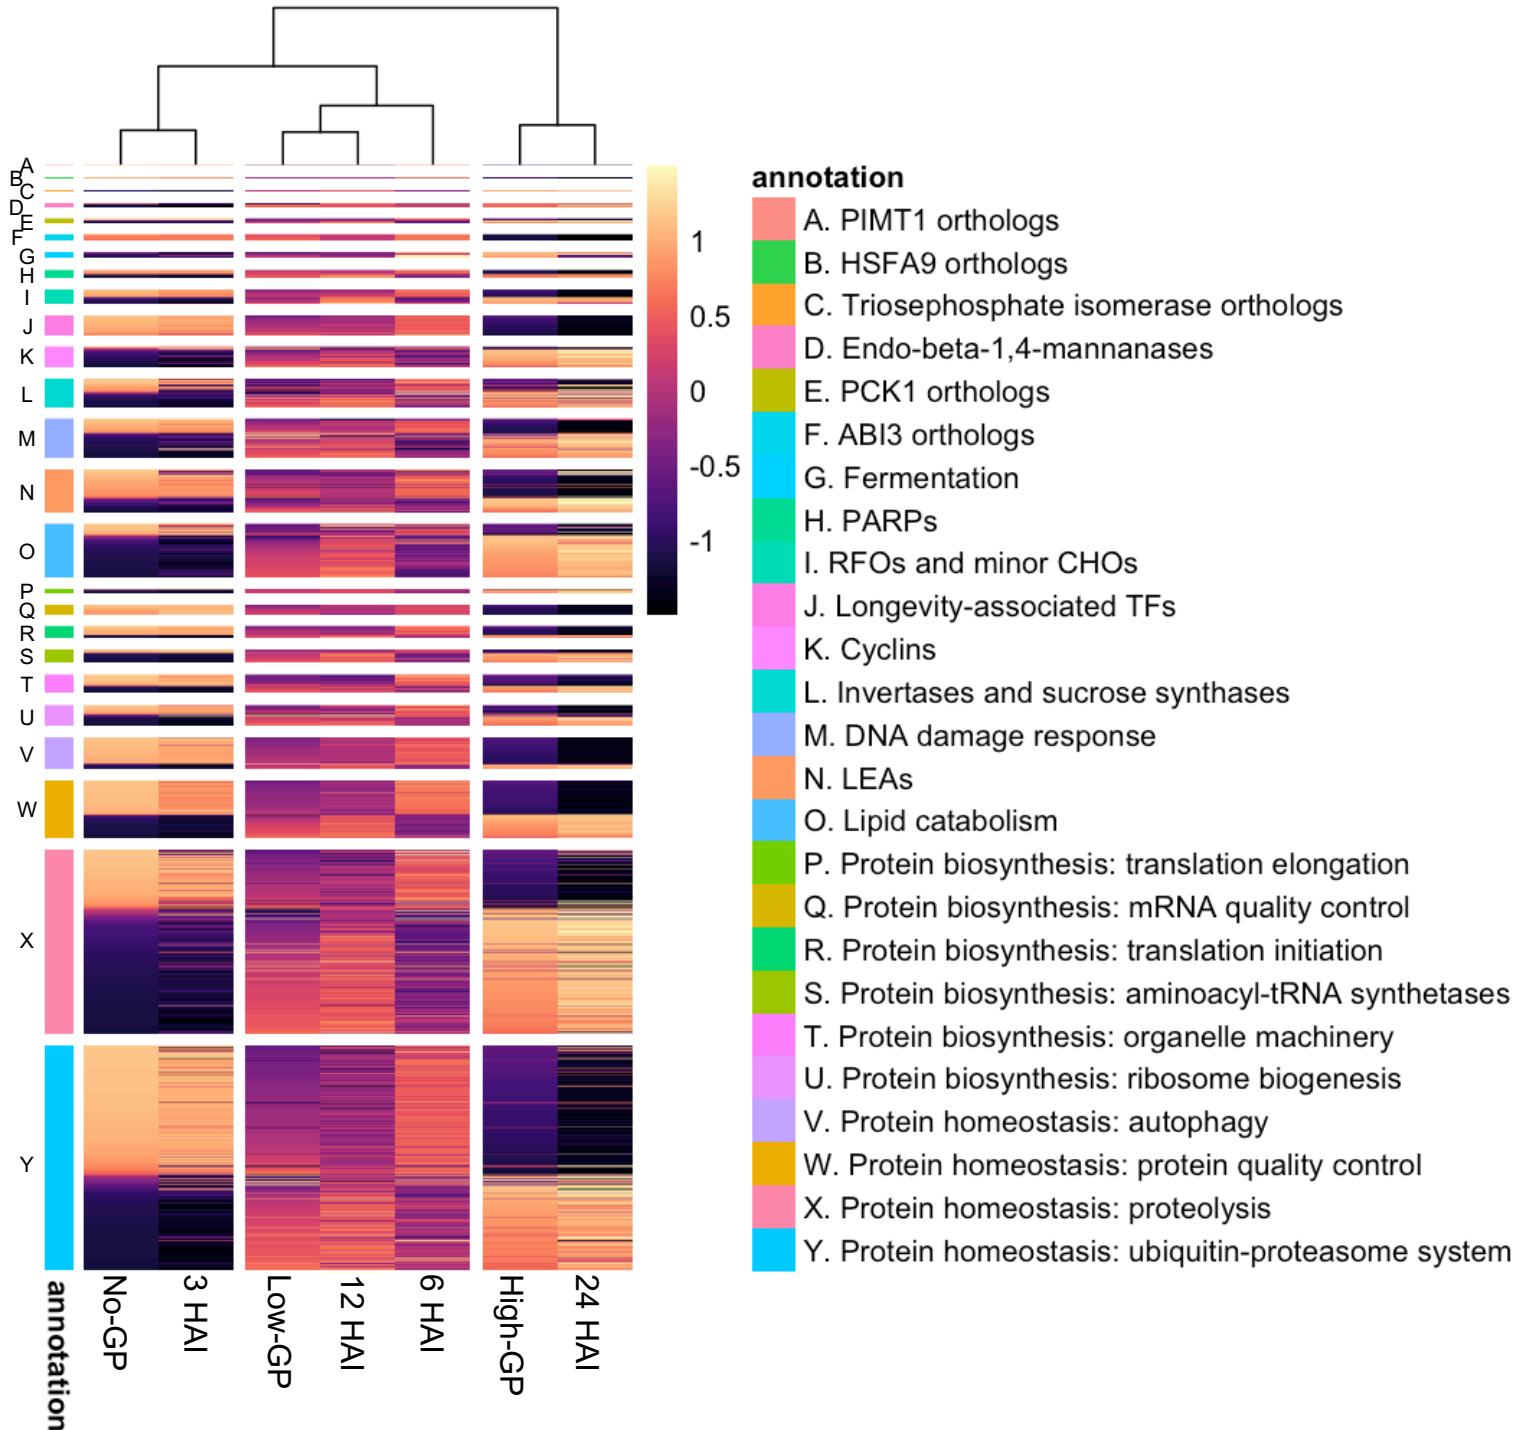

Figure 9. Heat map of z-score-corrected  $\log_2FC$  for 5712 transcripts involved in germination (see Supplemental Table 7), ordered on the y-axis by annotation and decreasing z-score in no-GP soybean axes, and clustered on the x-axis by expression profile.  $\log_2FC$  values were corrected by z-score independently for GP categories and imbibition time-points. Genes were significantly differentially expressed in at least one of the GP categories. The same patterns observed in Fig. 8 were seen here also: GP categories did not cluster together, and increasing GP was associated with increased imbibition time; opposite expression intensity was found in no-GP/3 HAI versus high-GP/24 HAI, while low-GP/12 HAI/6 HAI axes were intermediate. No misregulation of germination genes in no- or low-GP categories compared to their early imbibition counterparts was apparent.
